# Supplementary material
Source: Research Square preprint supplement (doi:10.21203/rs.3.rs-9829392/v1)

# Feeder1 selected bus and line validation

phase a    phase b    phase c    OPF    Power flow using OpenDSS

## Hierarchical: bus feeder1\_3155 voltage

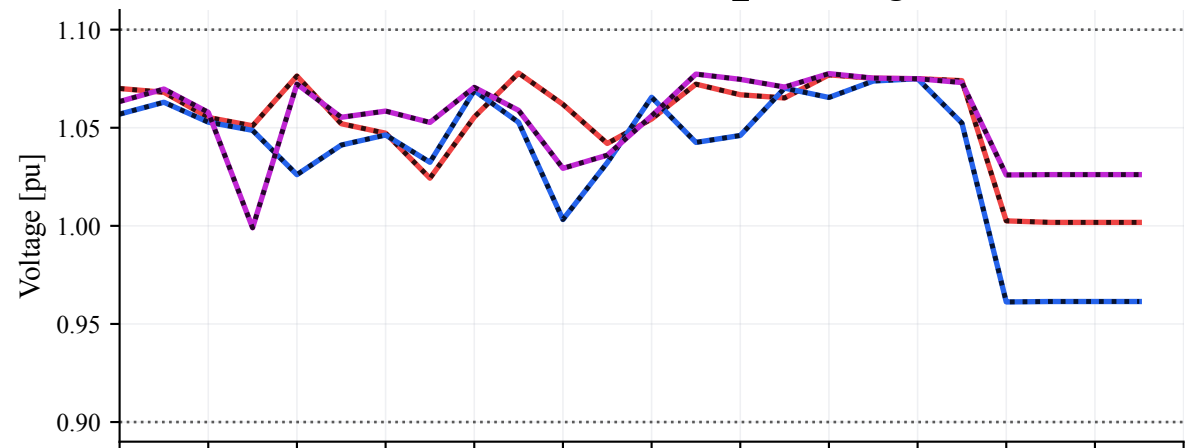

## Hierarchical: line feeder1\_line1 current

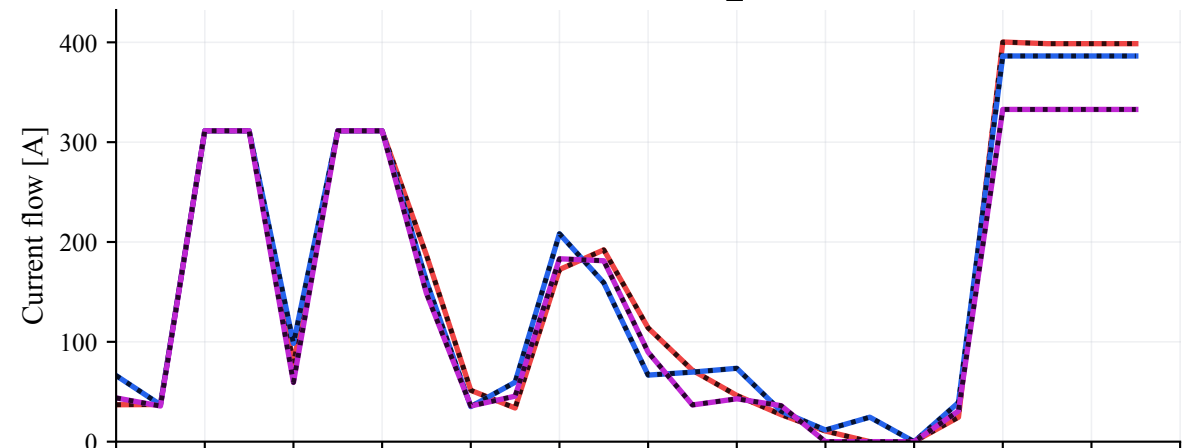

## Centralized: bus feeder1\_3155 voltage

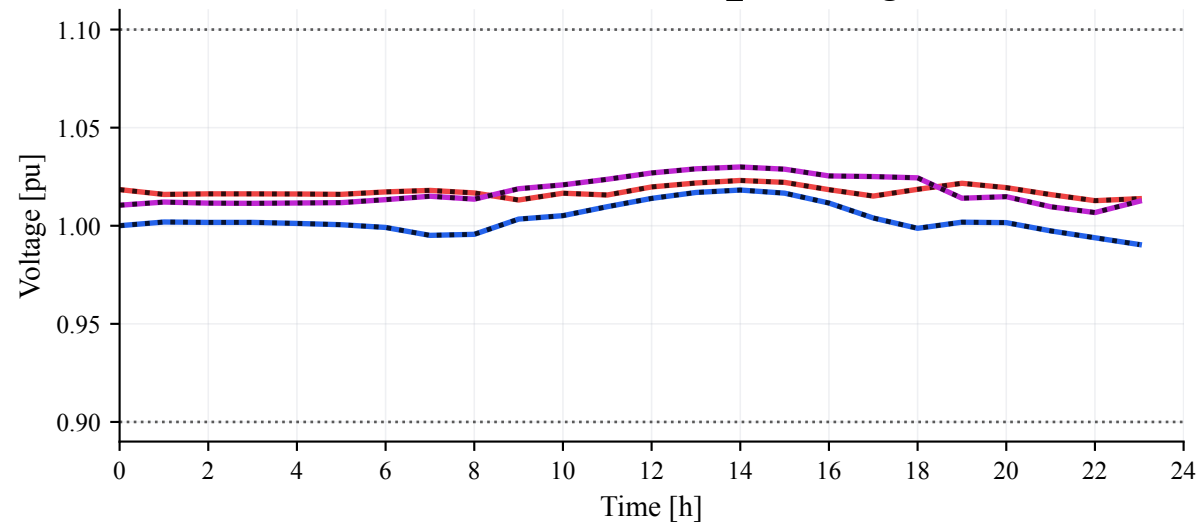

## Centralized: line feeder1\_line1 current

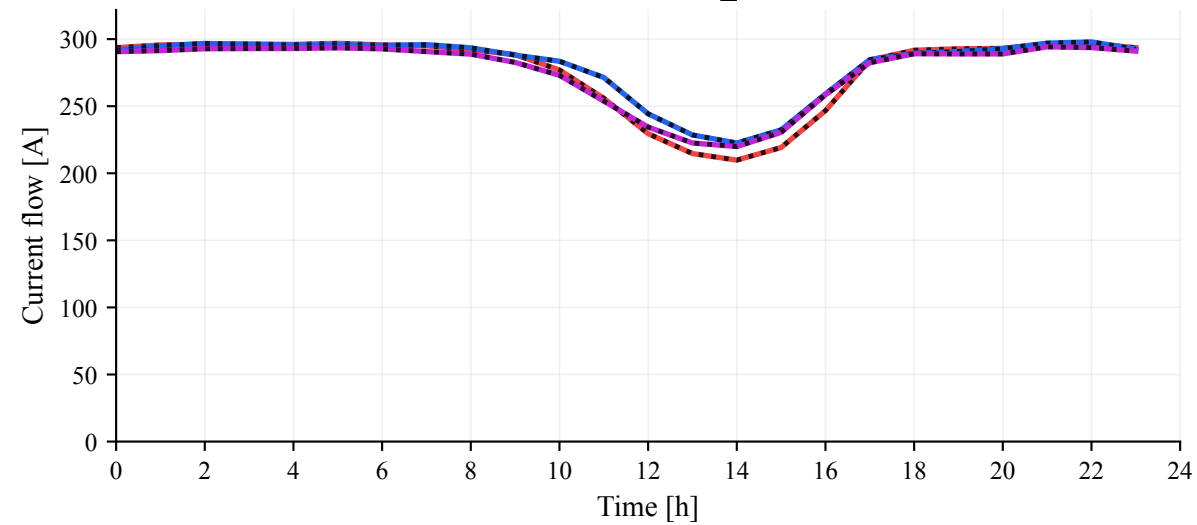

Supplement: Supplementary file 15 [file opf_validation_selected_bus_line_subplot_board.pdf › Figures/opf_validation_selected_bus_line_subplot_board.pdf]
