# Supplementary material
Source: Research Square preprint supplement (doi:10.21203/rs.3.rs-9829392/v1)

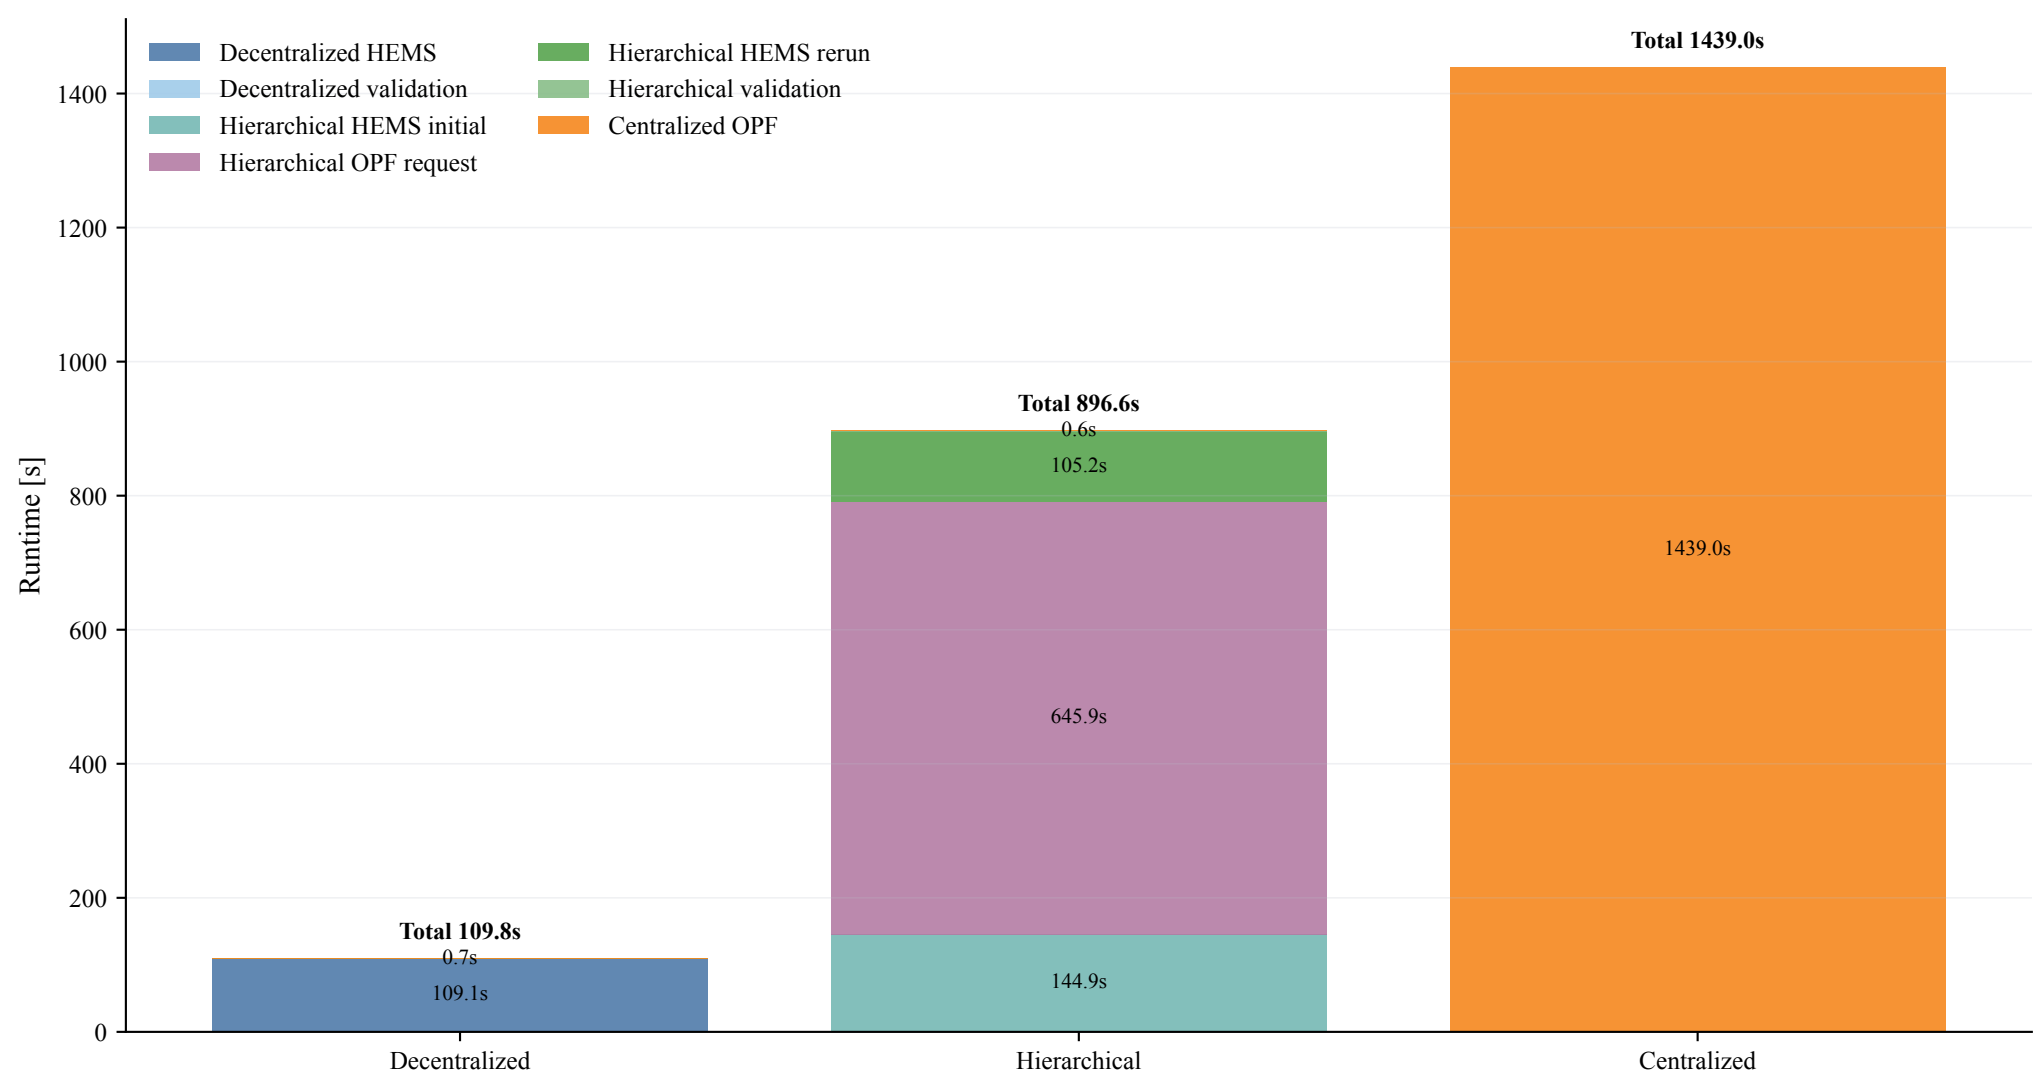

Supplement: Supplementary file 1 [file architecture_runtime_breakdown.pdf › Figures/architecture_runtime_breakdown.pdf]

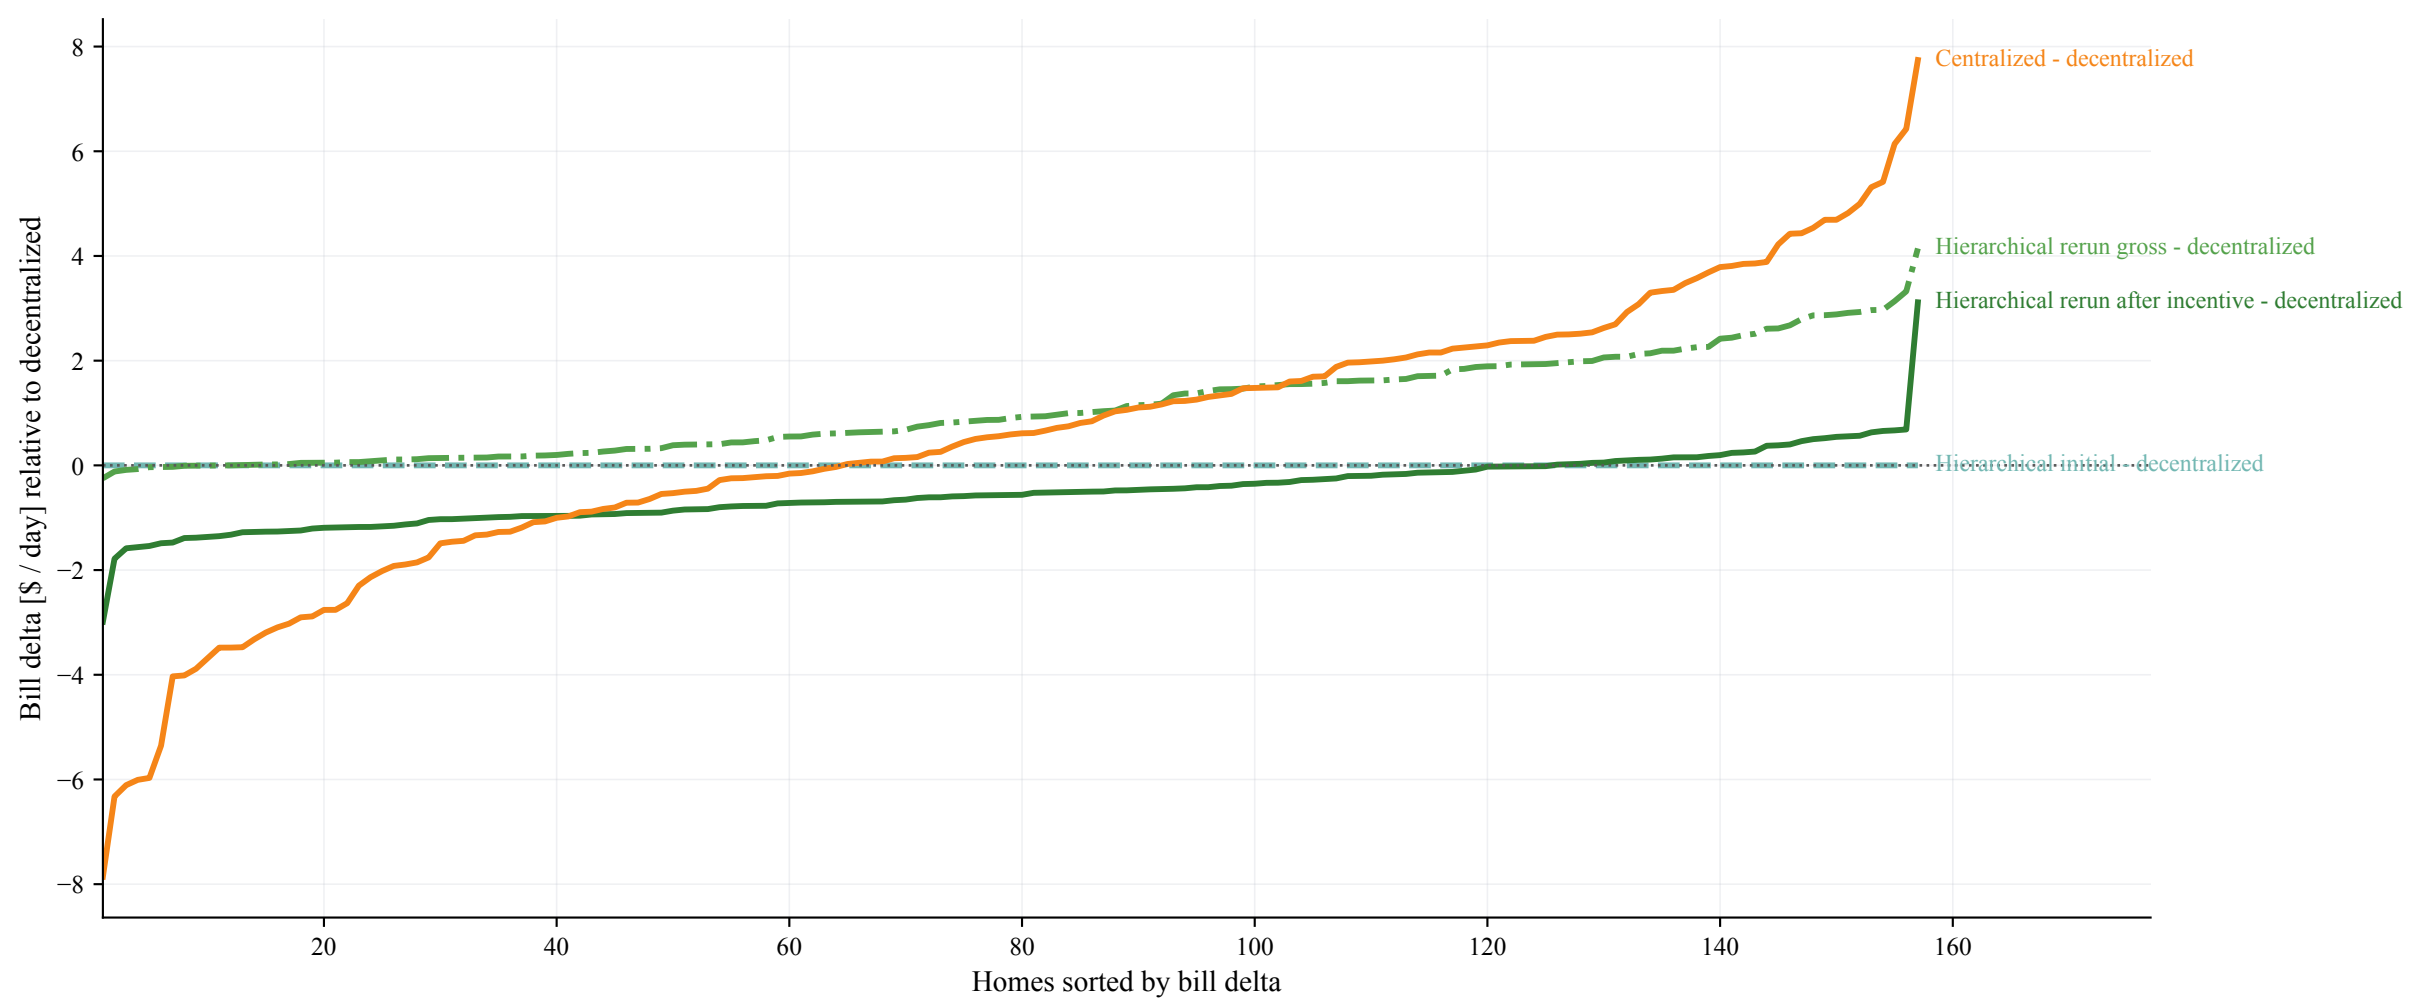

Supplement: Supplementary file 2 [file controller_bill_delta_sorted_profiles.pdf › Figures/controller_bill_delta_sorted_profiles.pdf]

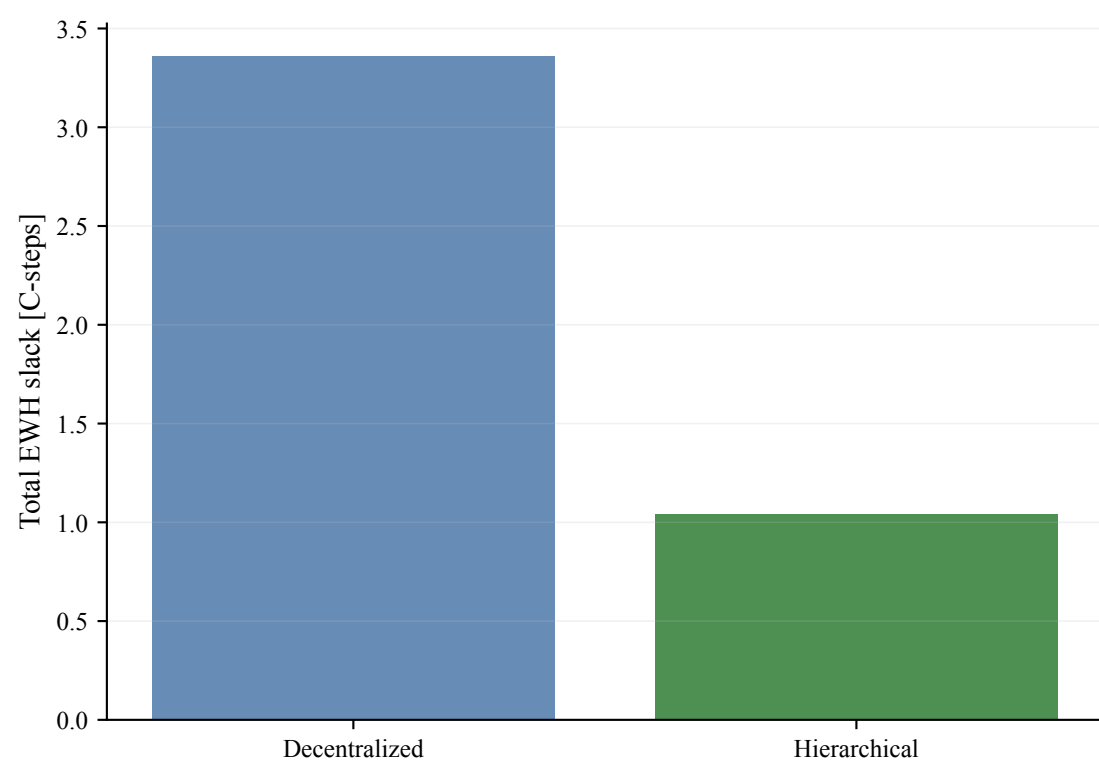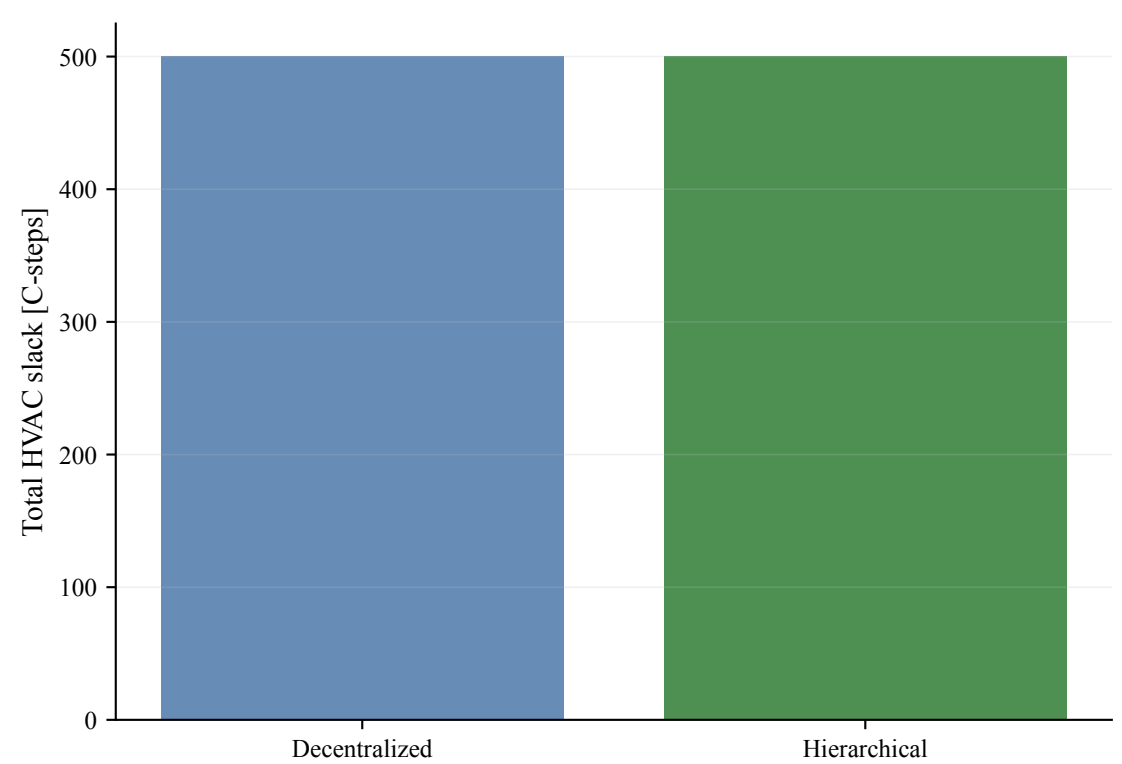

Supplement: Supplementary file 3 [file controller_comfort_service_summary.pdf › Figures/controller_comfort_service_summary.pdf]

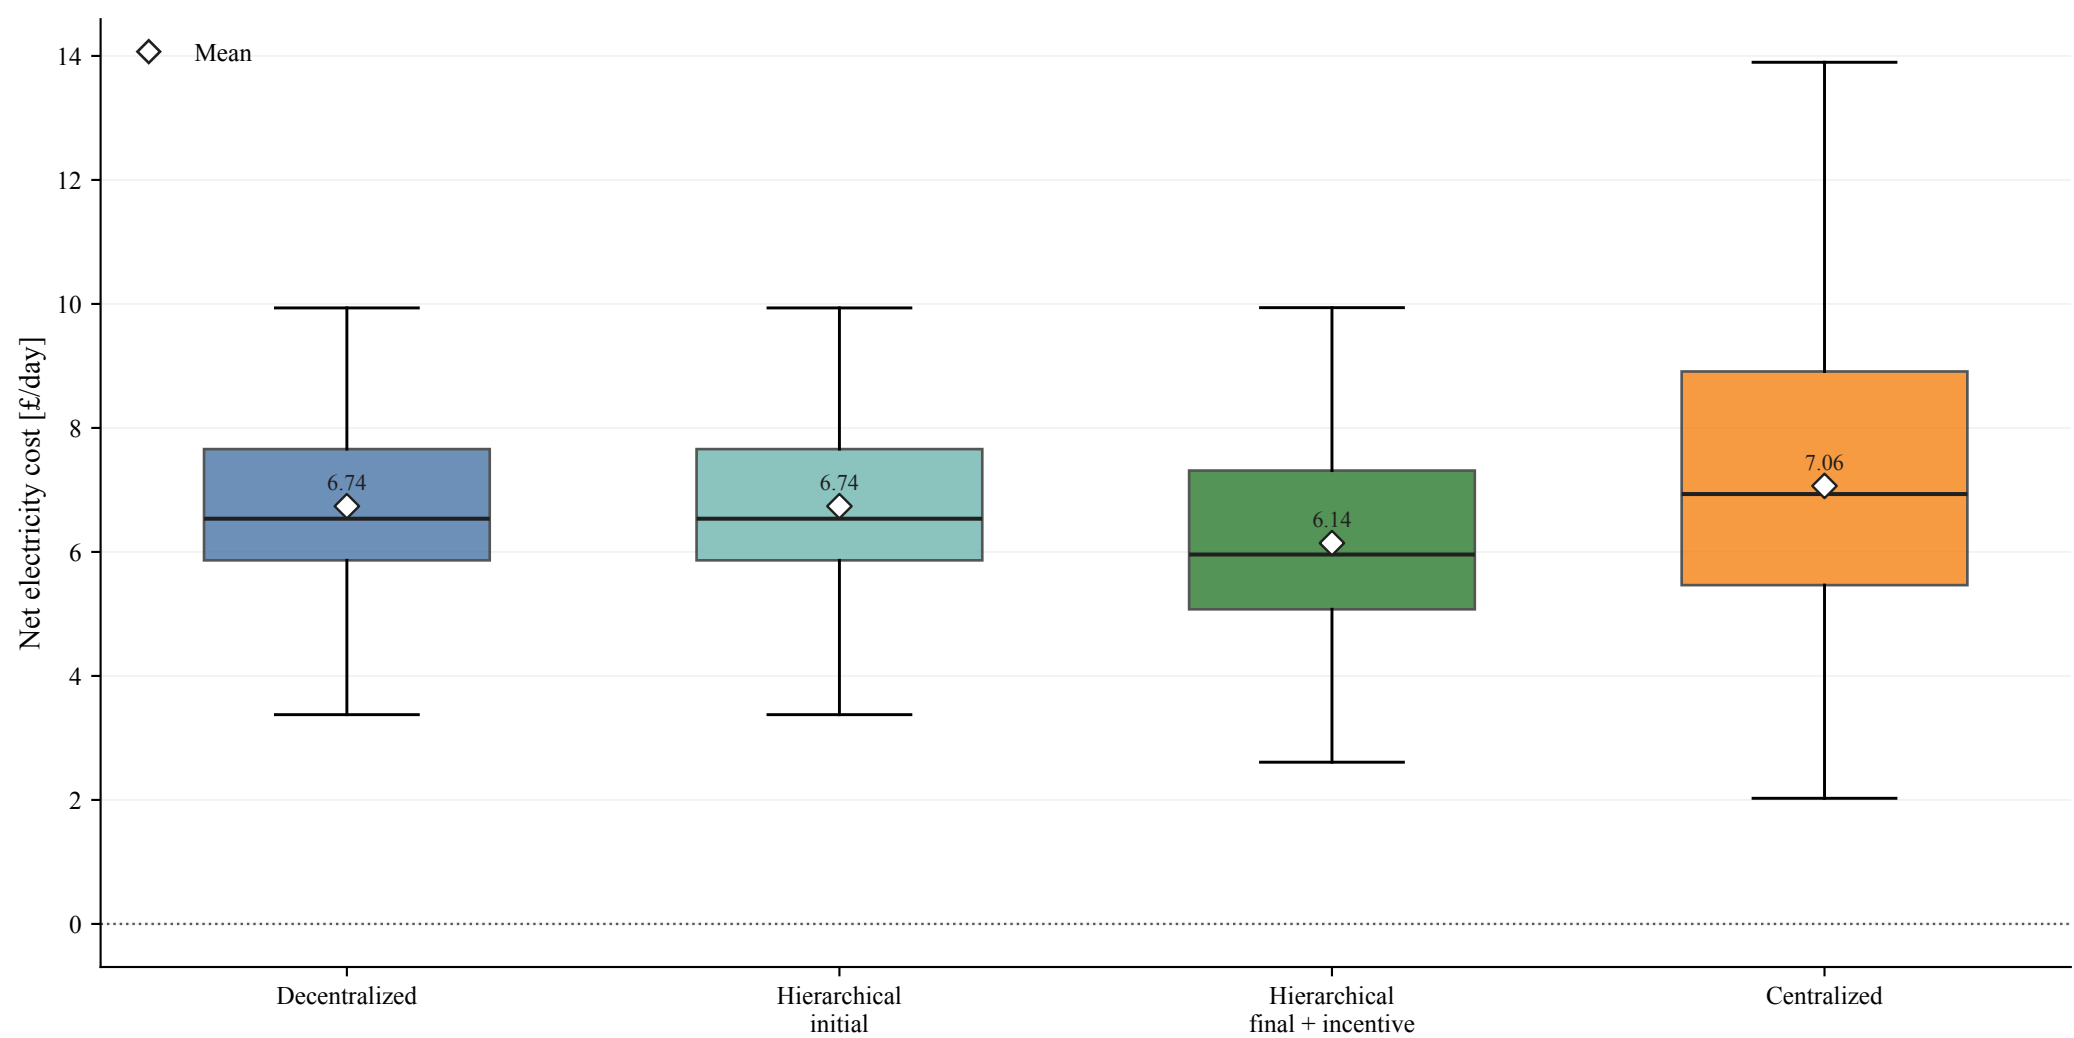

Supplement: Supplementary file 4 [file controller_cost_boxplot.pdf › Figures/controller_cost_boxplot.pdf]

Per-home daily bill deltas relative to decentralized control

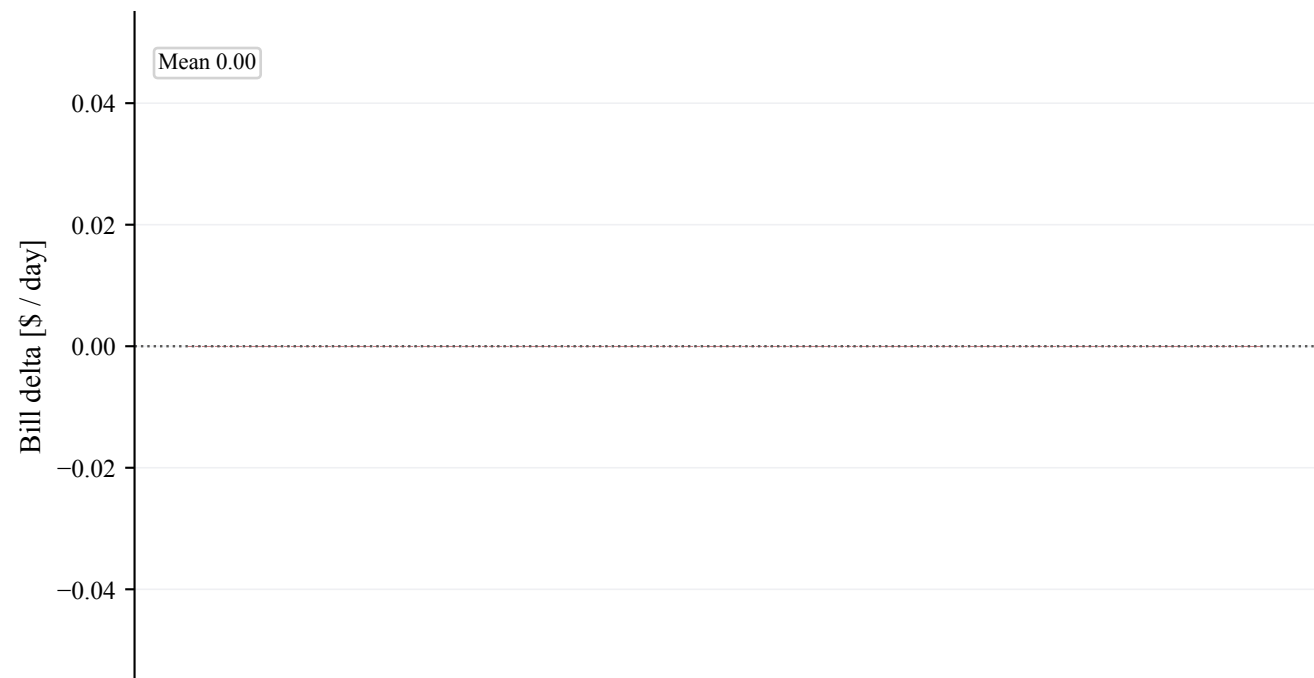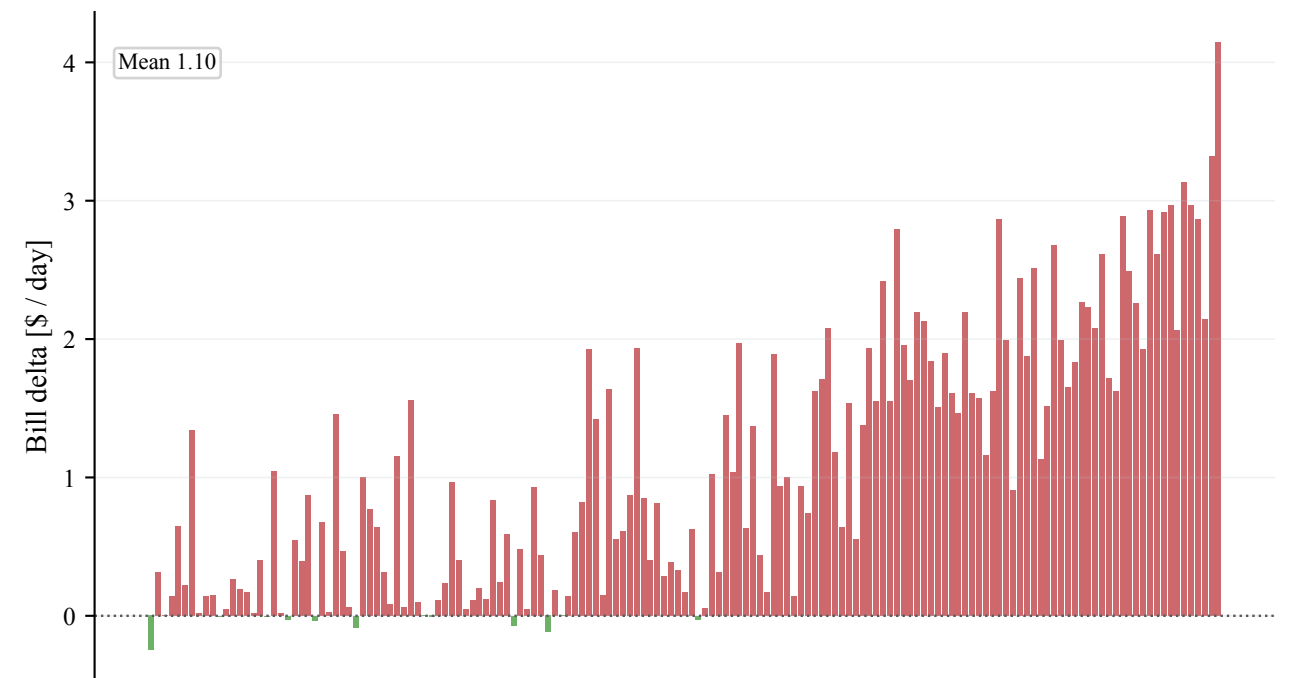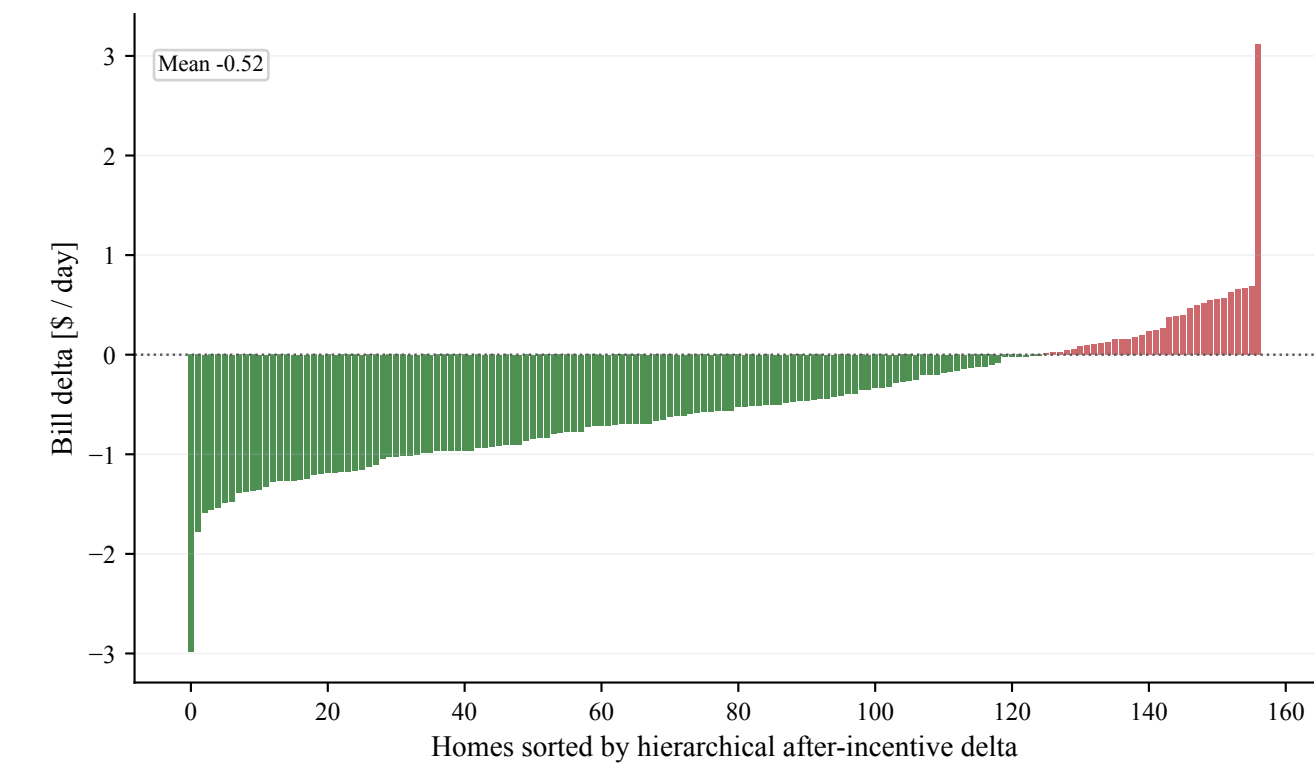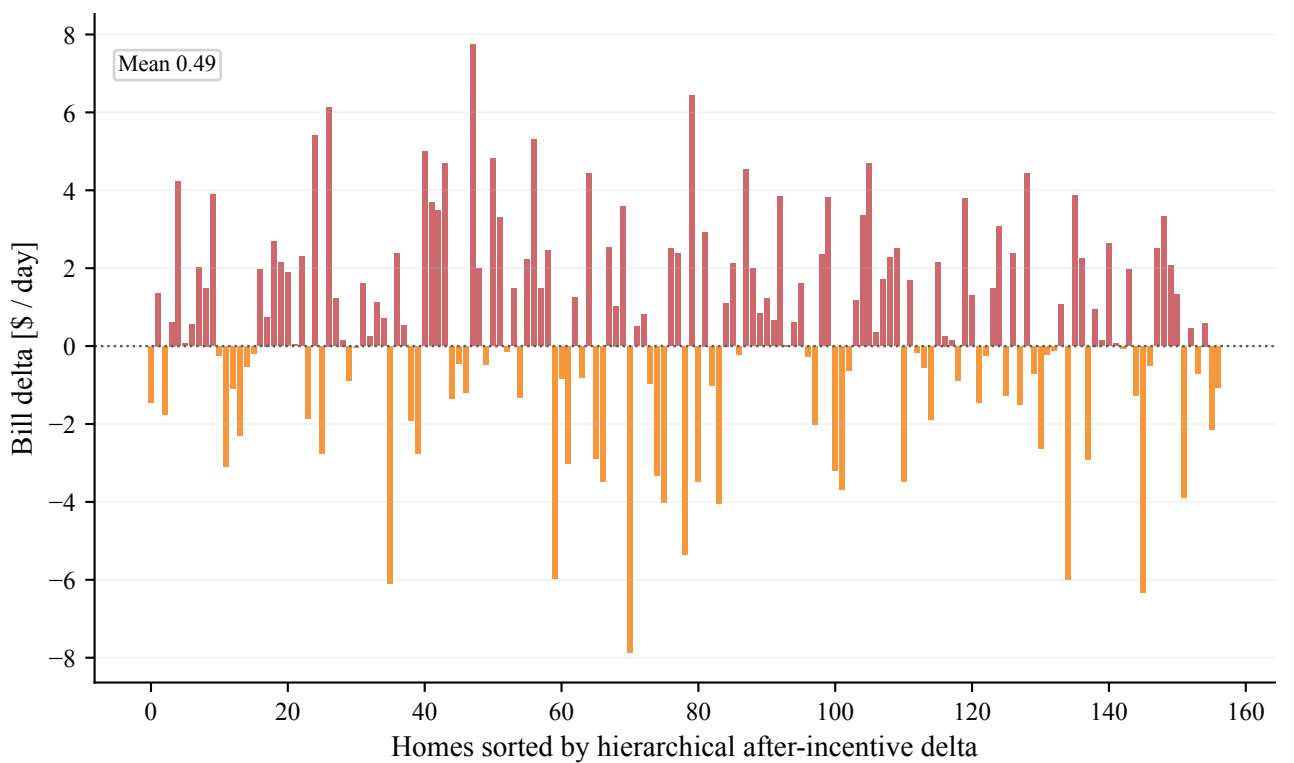

Supplement: Supplementary file 5 [file controller_cost_delta_panels.pdf › Figures/controller_cost_delta_panels.pdf]

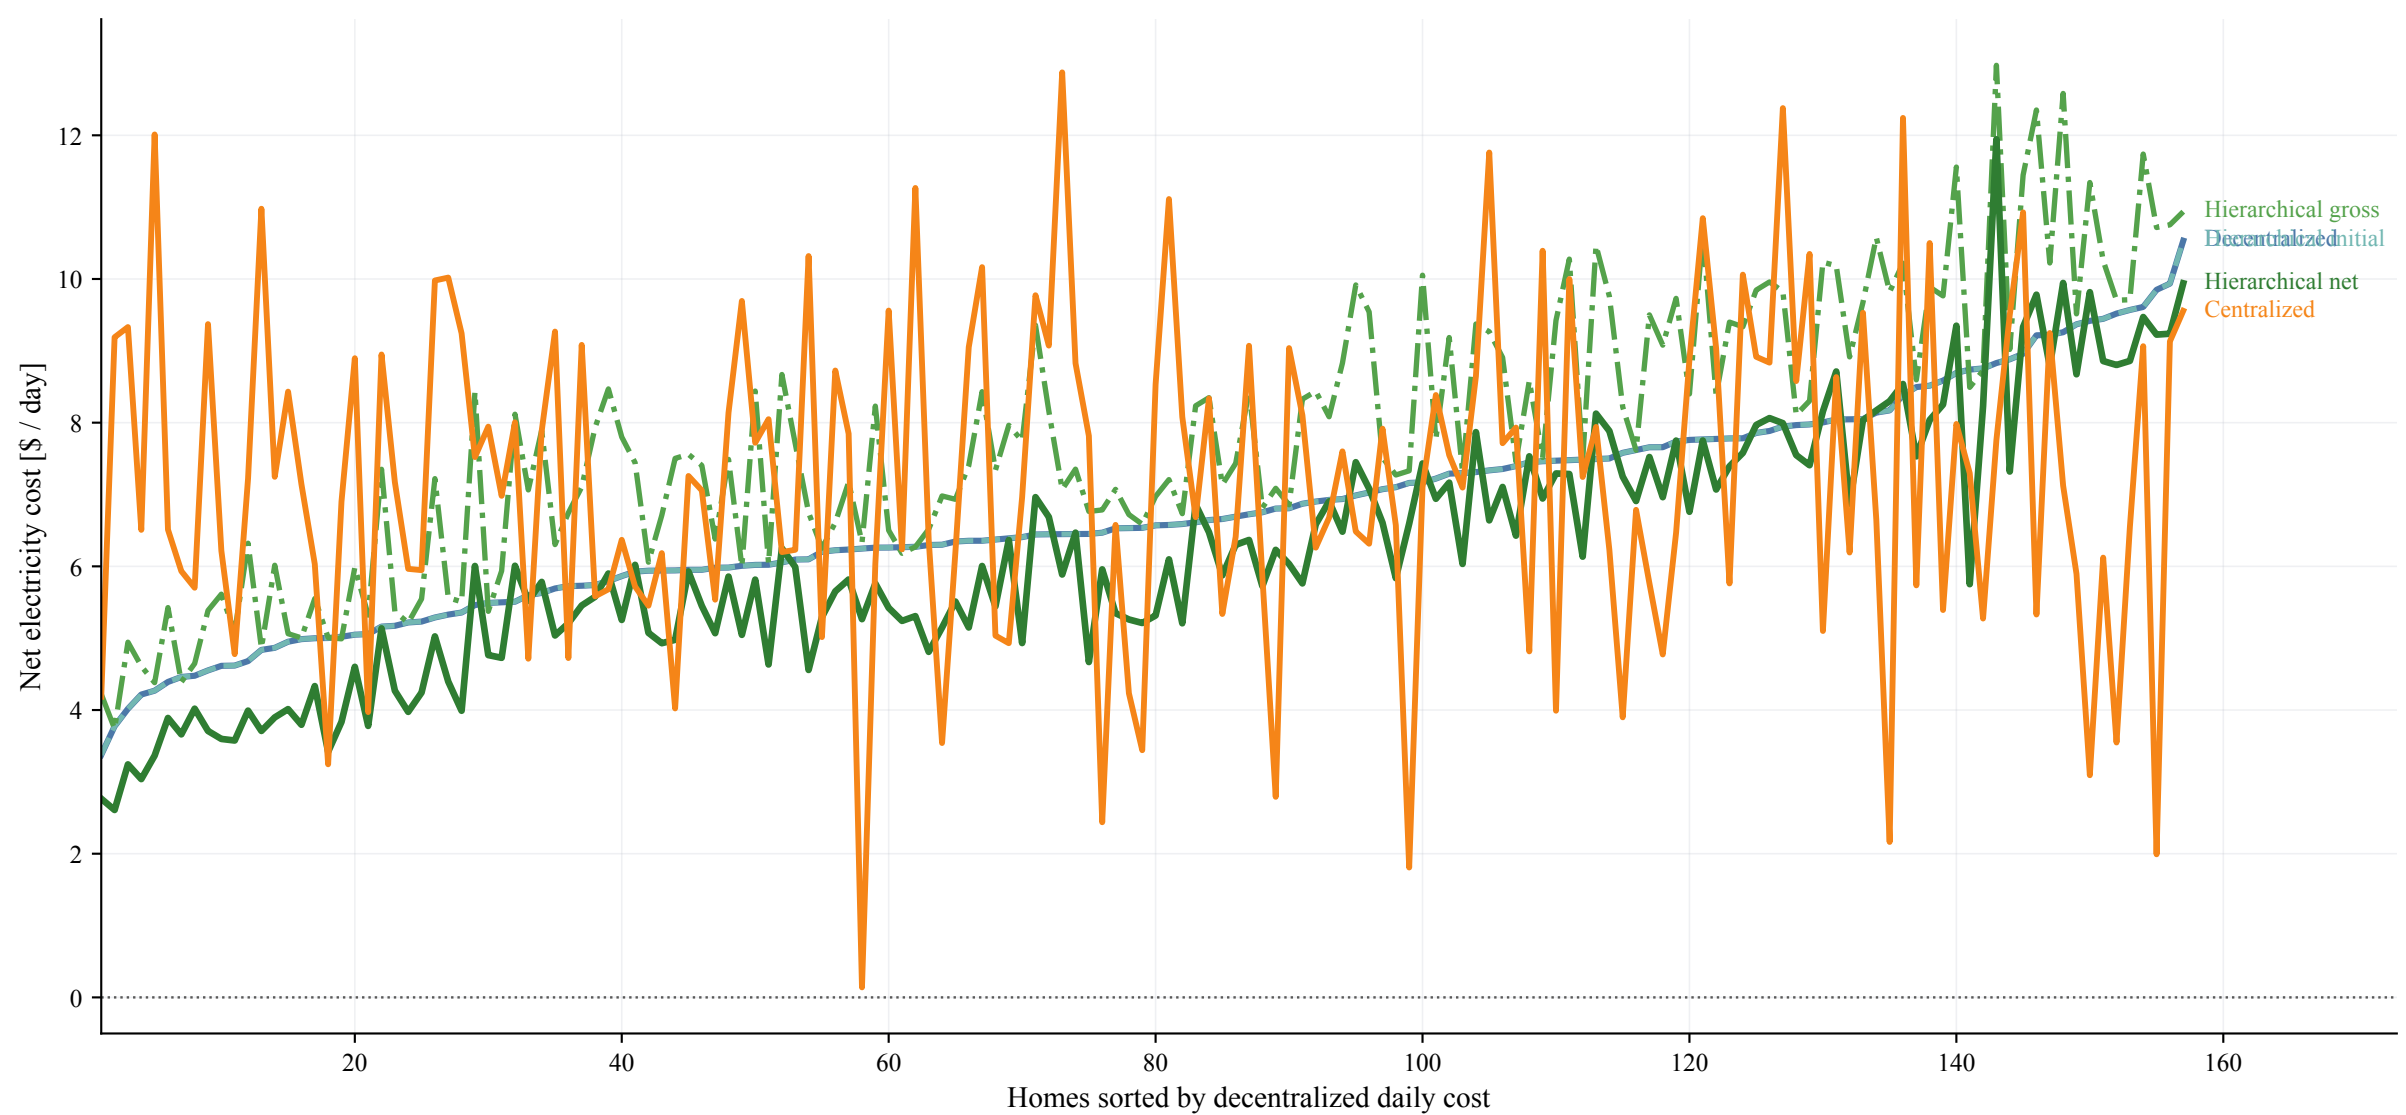

Supplement: Supplementary file 6 [file controller_cost_sorted_profiles.pdf › Figures/controller_cost_sorted_profiles.pdf]

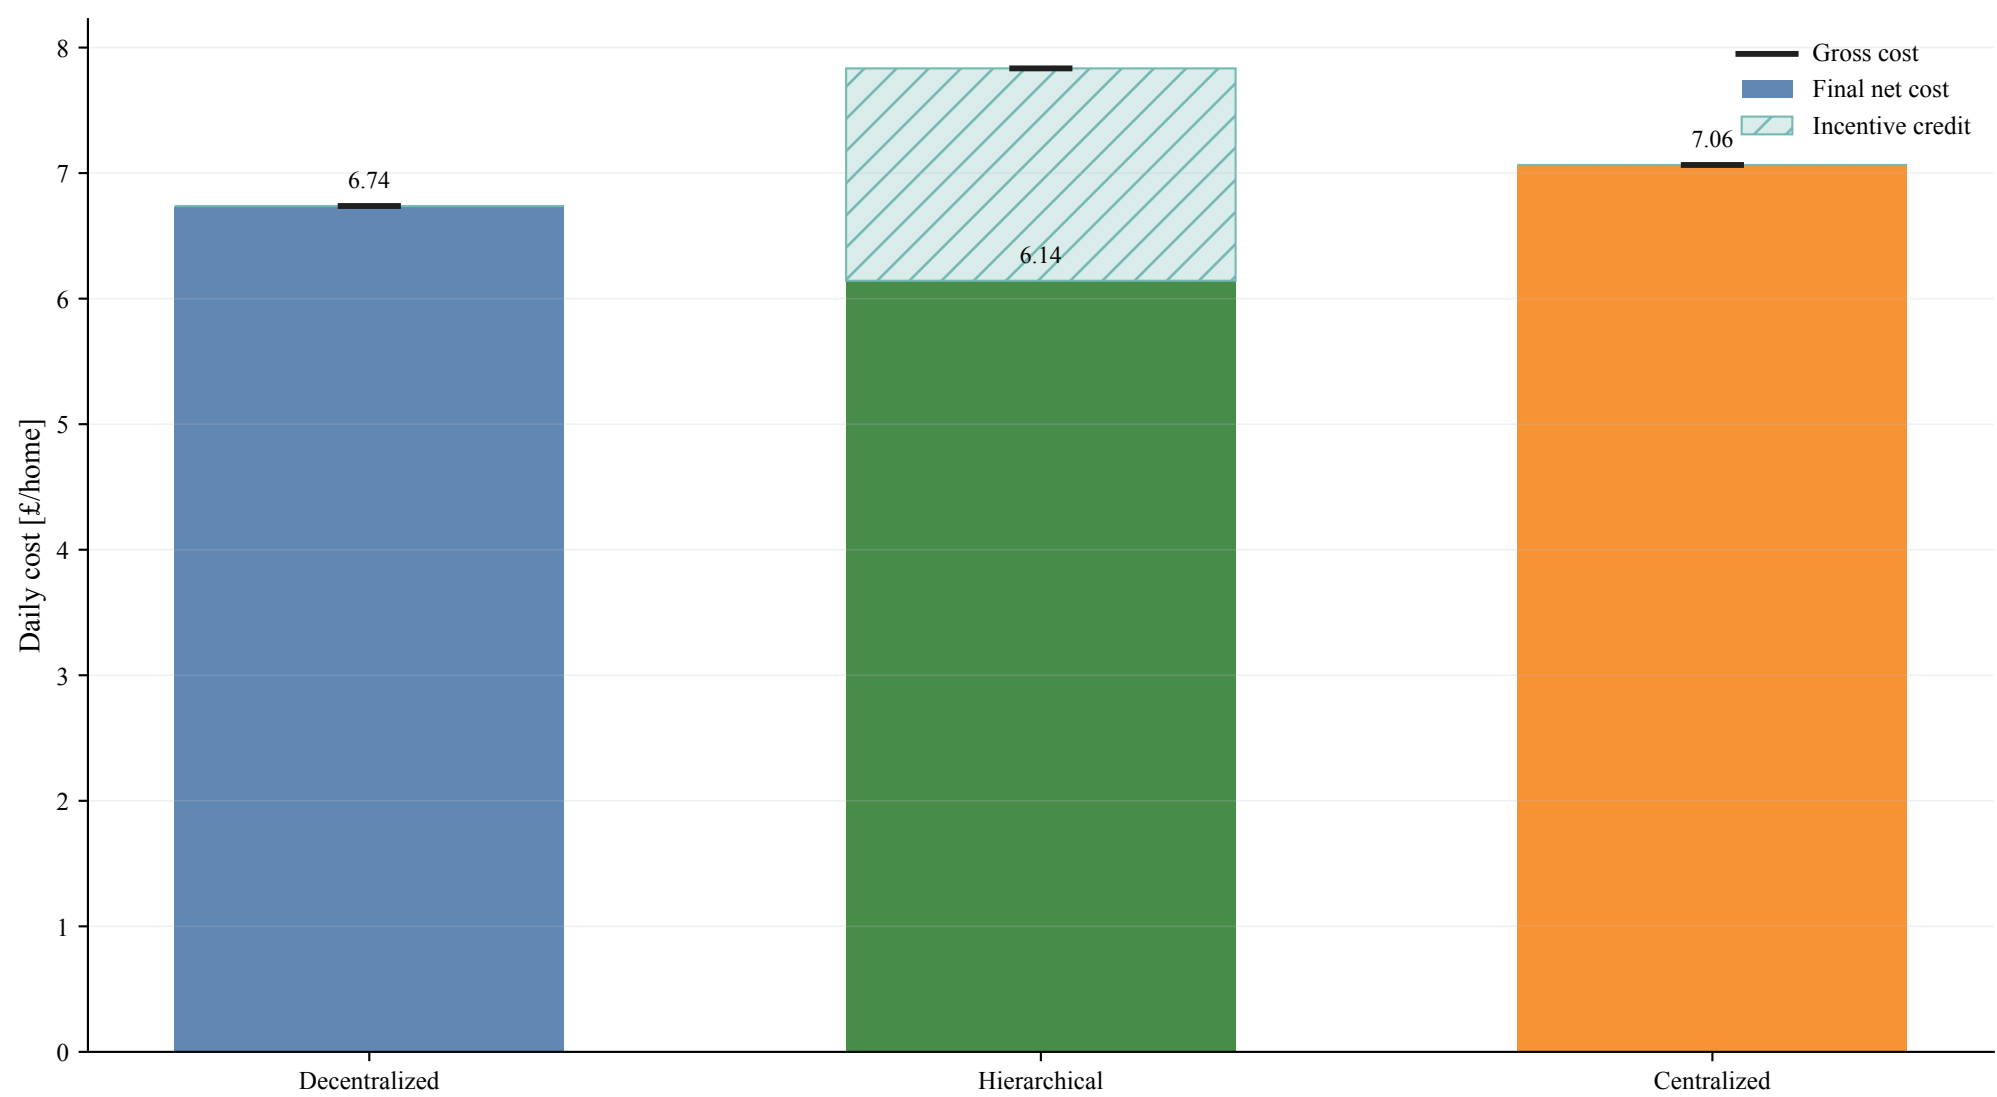

Supplement: Supplementary file 7 [file controller_economic_breakdown.pdf › Figures/controller_economic_breakdown.pdf]

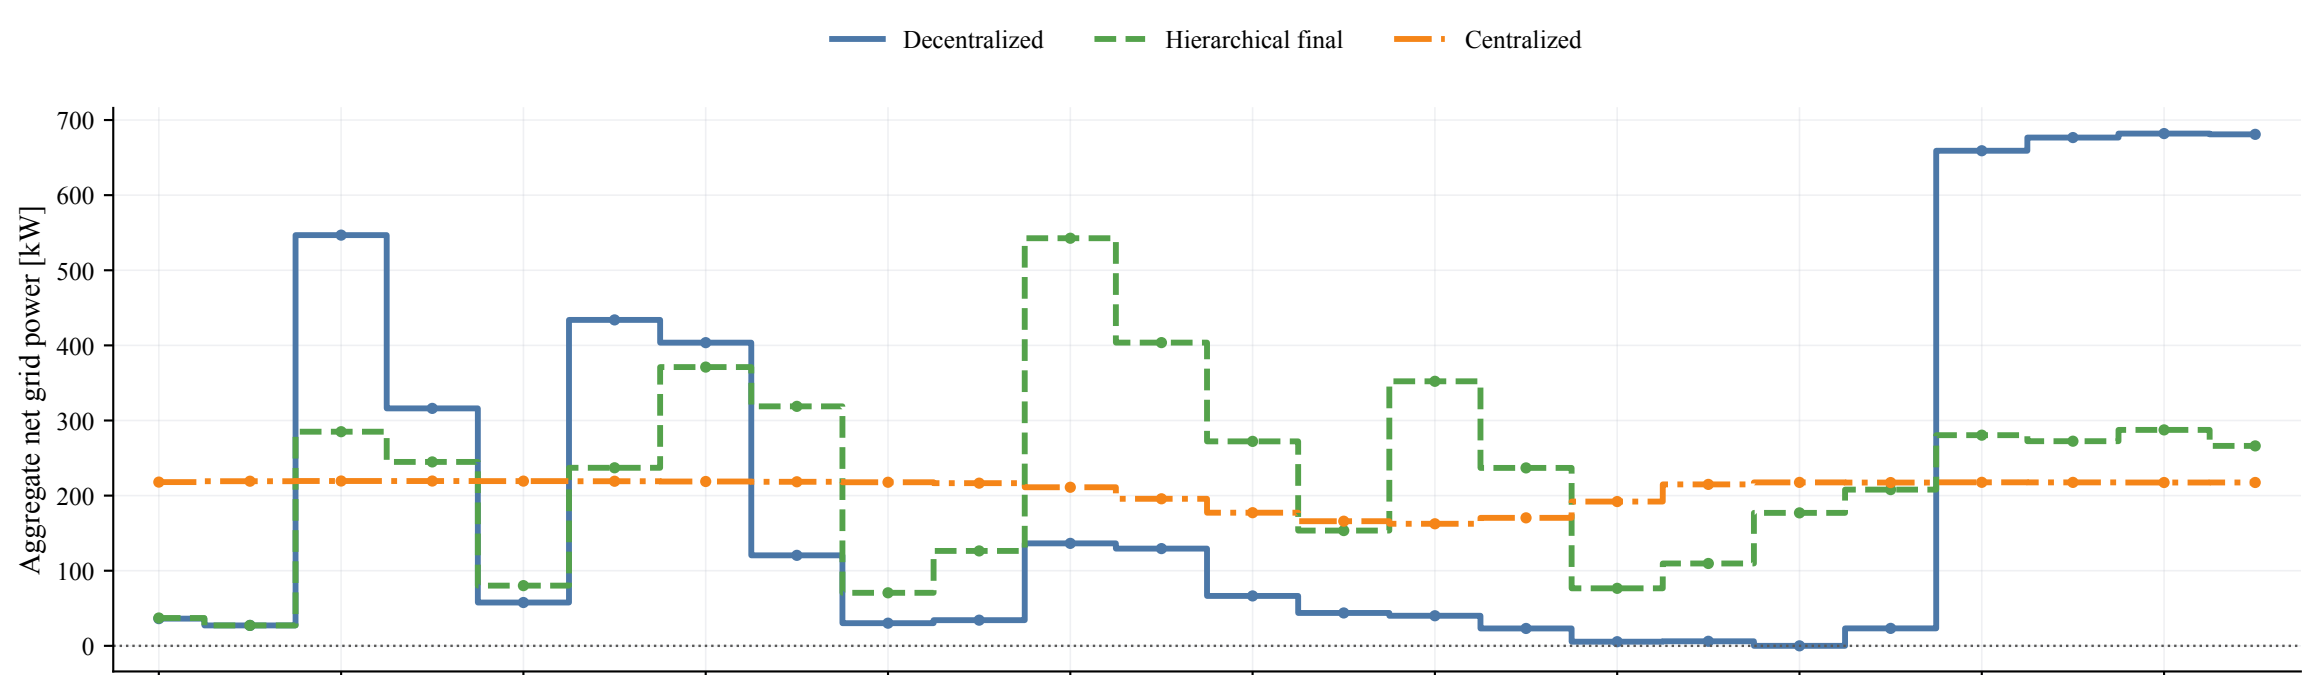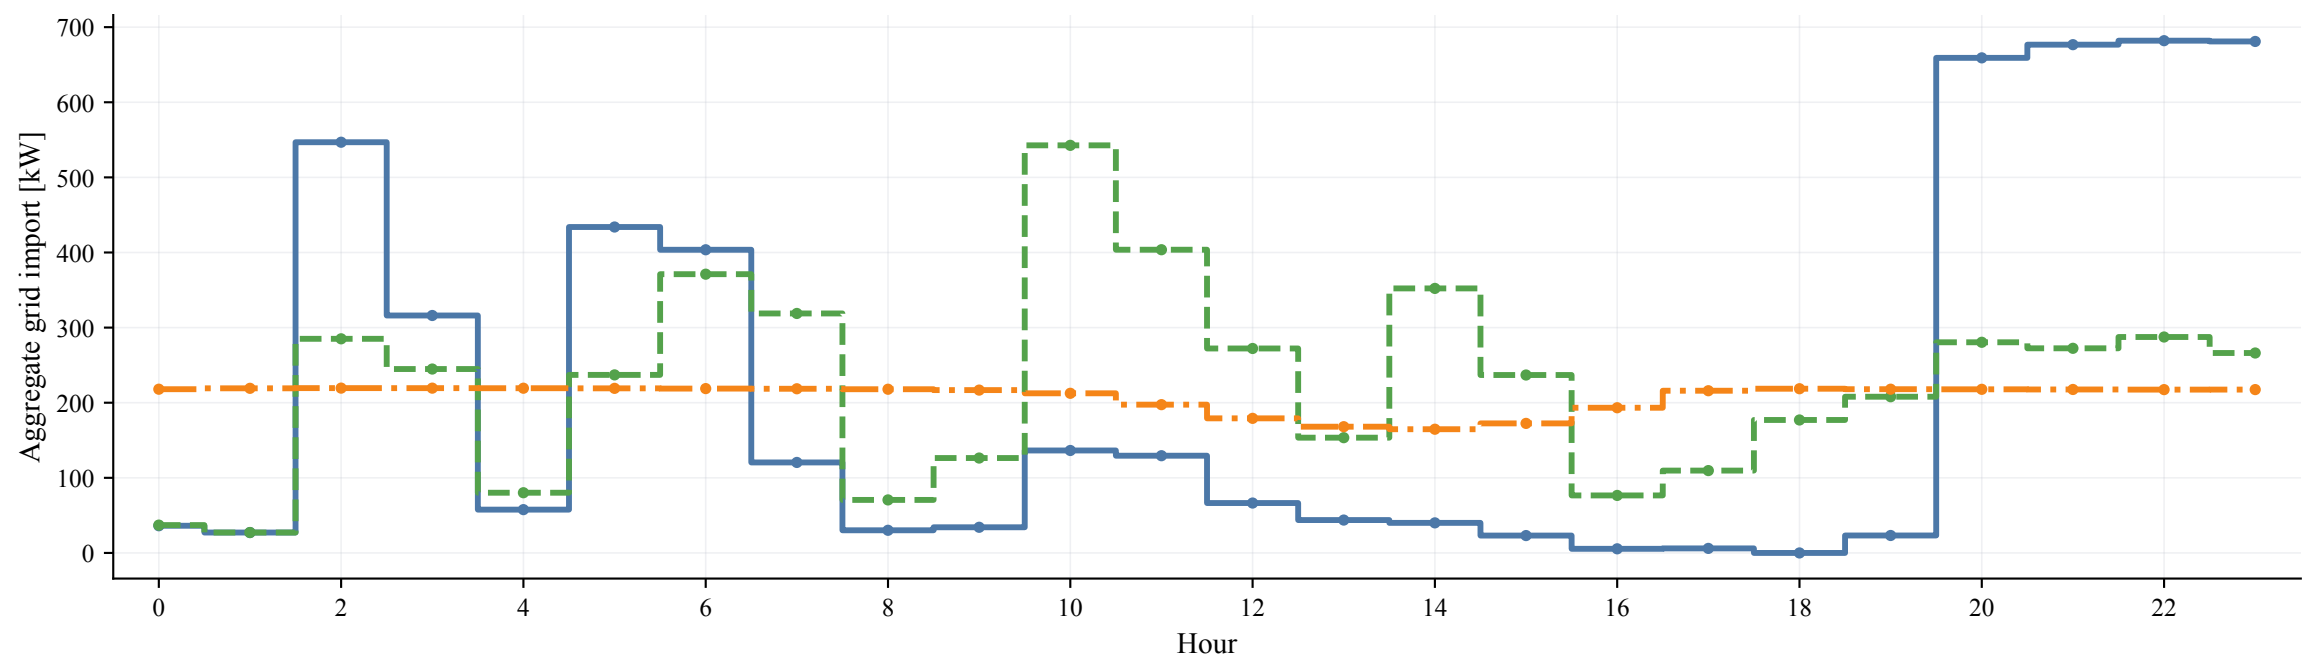

Supplement: Supplementary file 8 [file controller_hourly_demand_comparison.pdf › Figures/controller_hourly_demand_comparison.pdf]

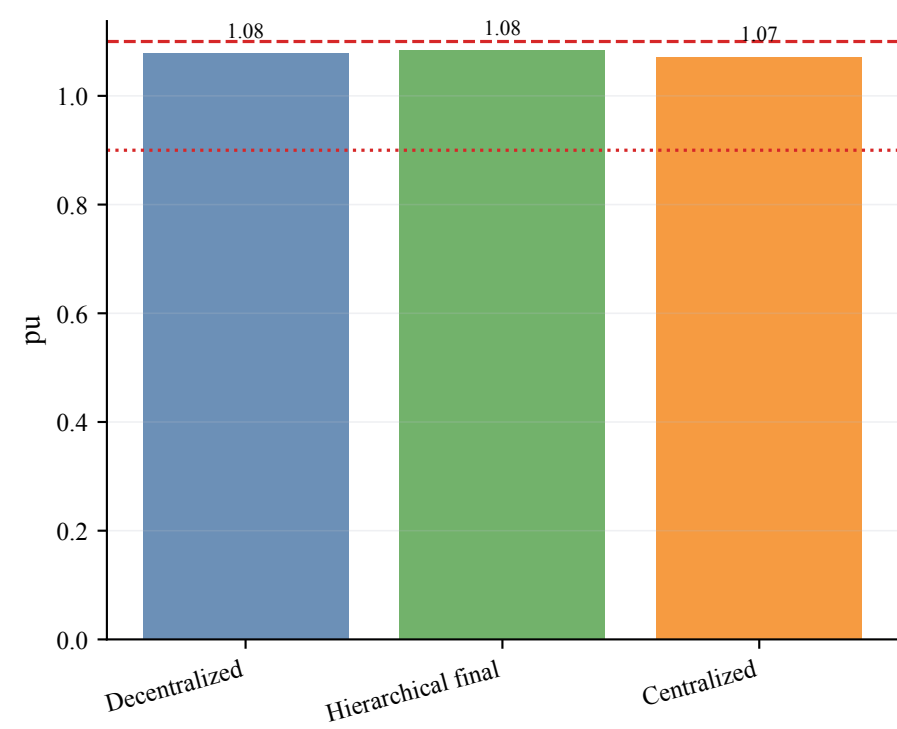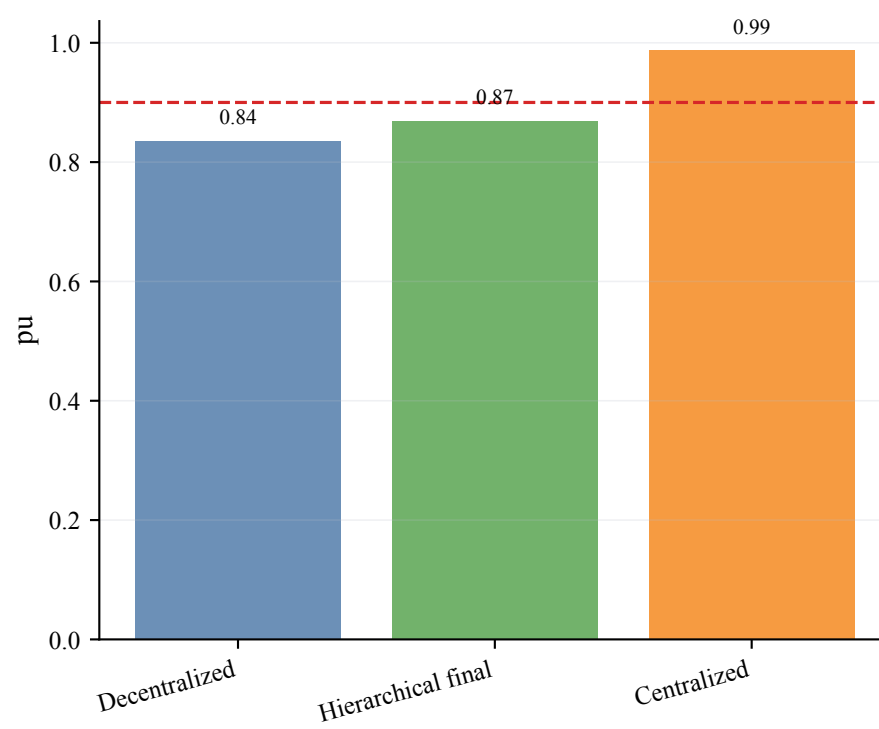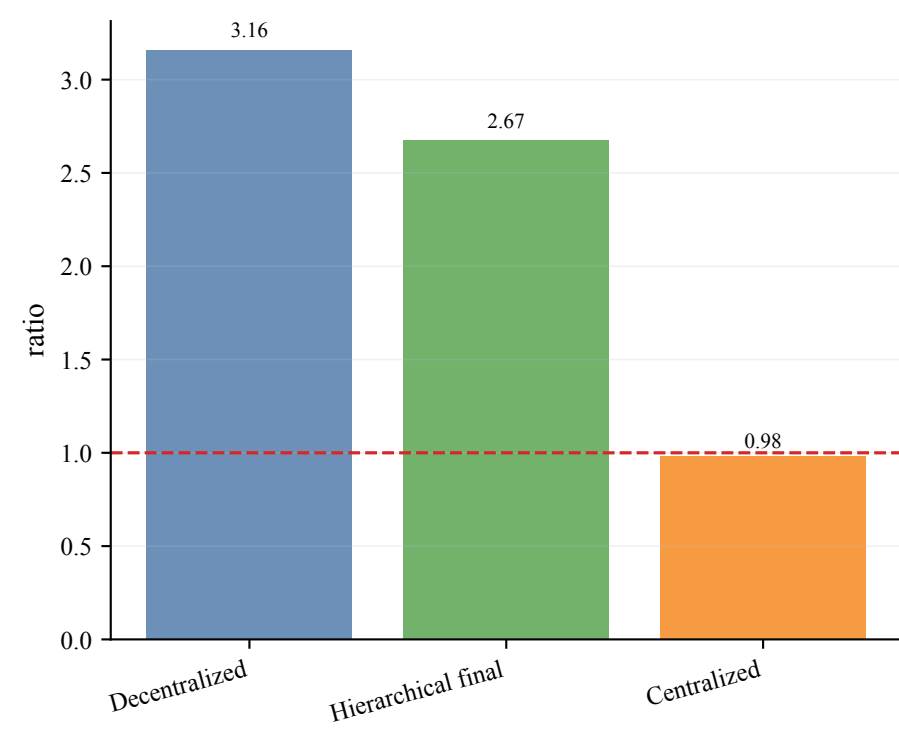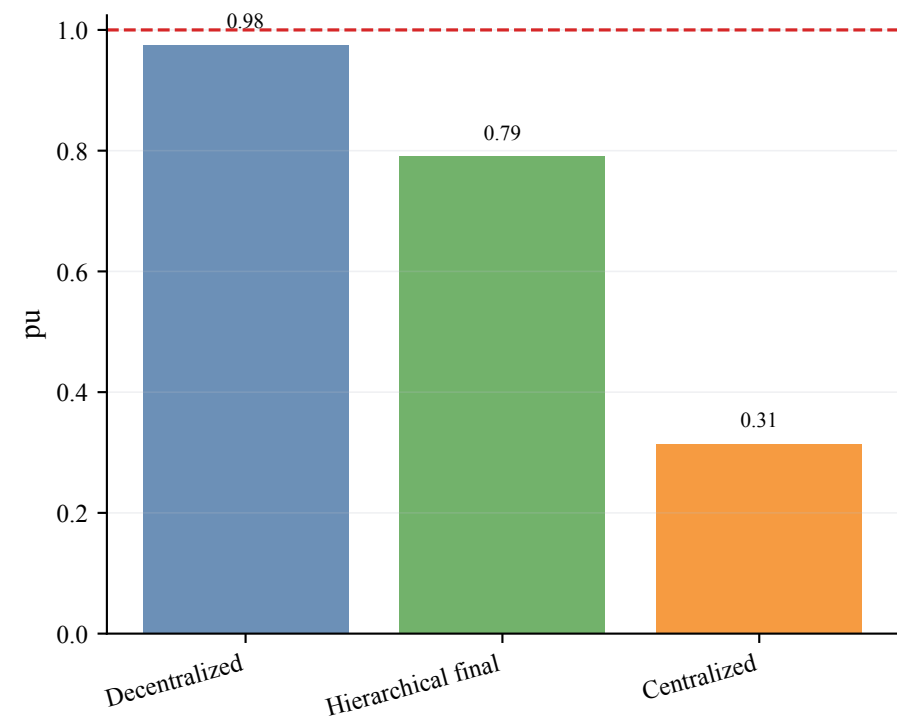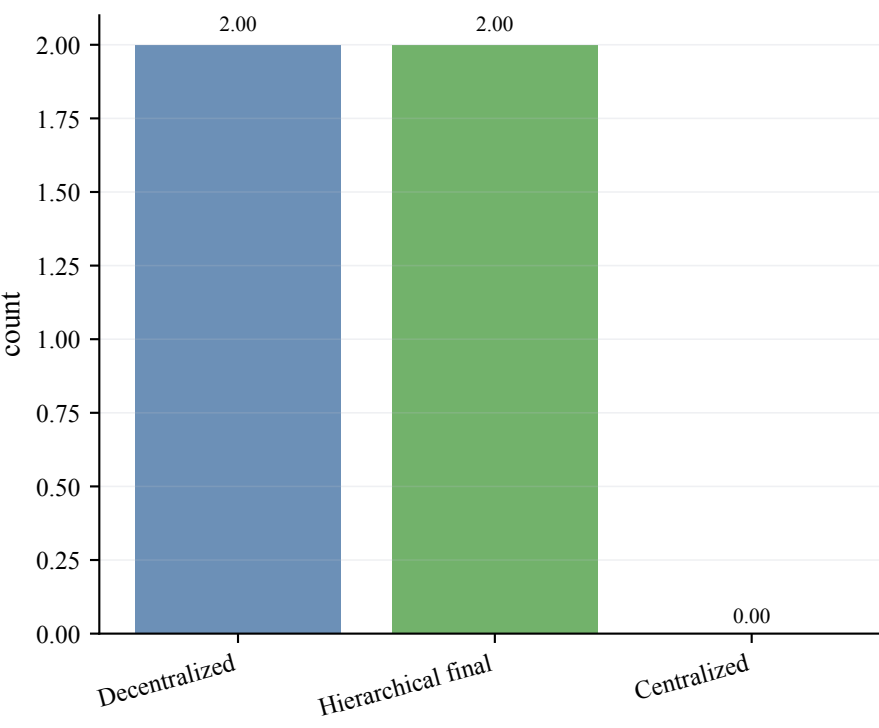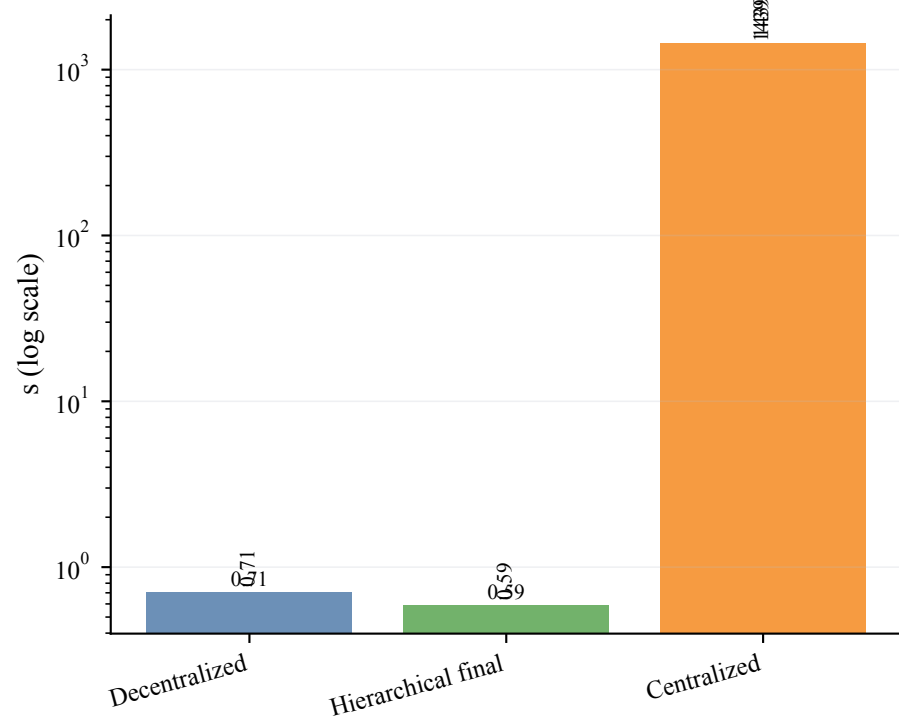

Supplement: Supplementary file 9 [file controller_network_summary.pdf › Figures/controller_network_summary.pdf]

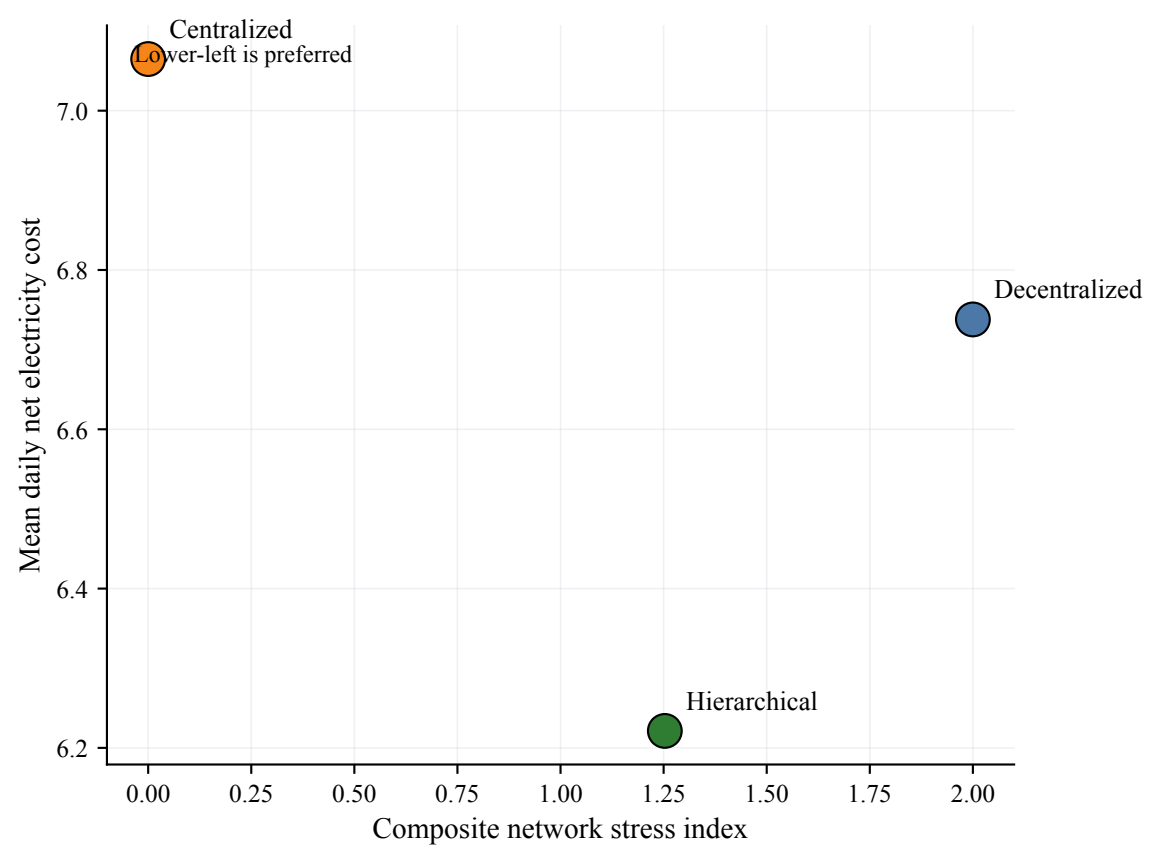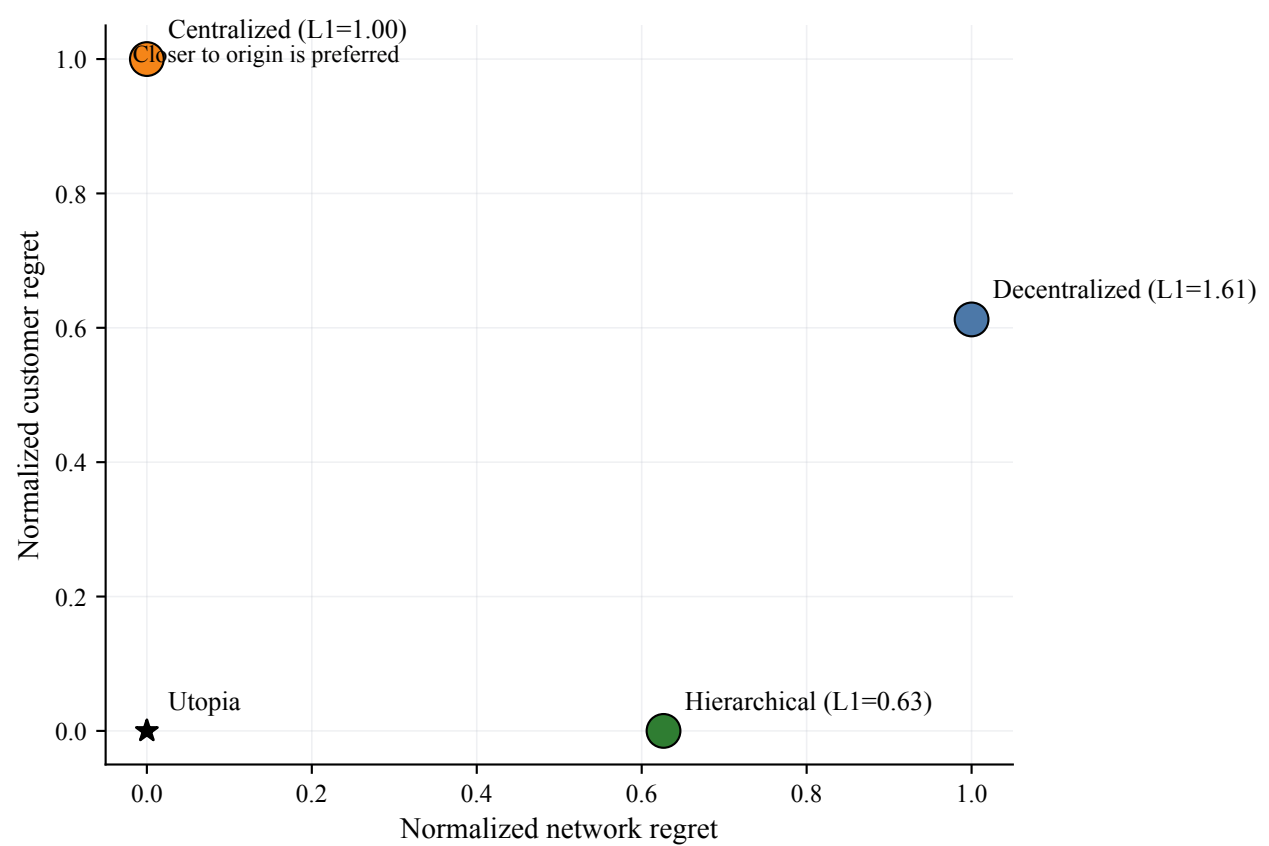

Supplement: Supplementary file 10 [file controller_regret_map.pdf › Figures/controller_regret_map.pdf]

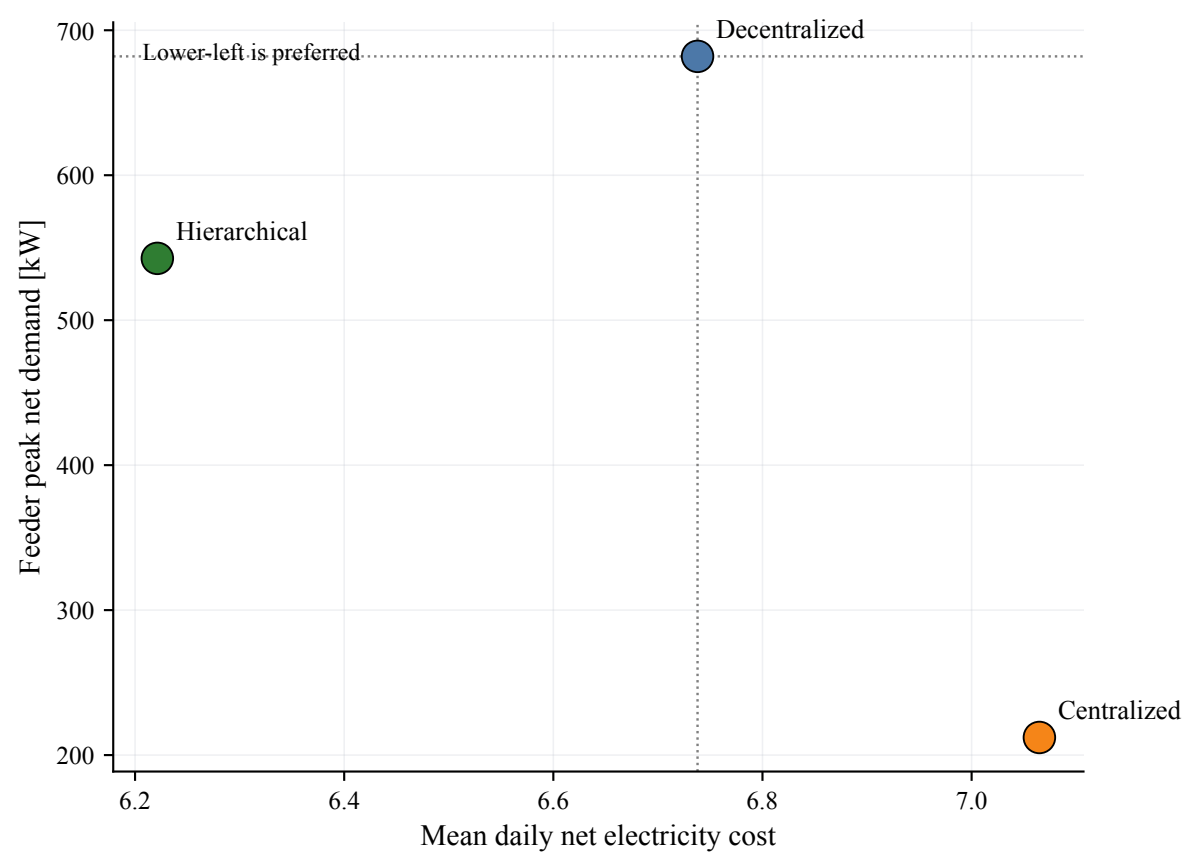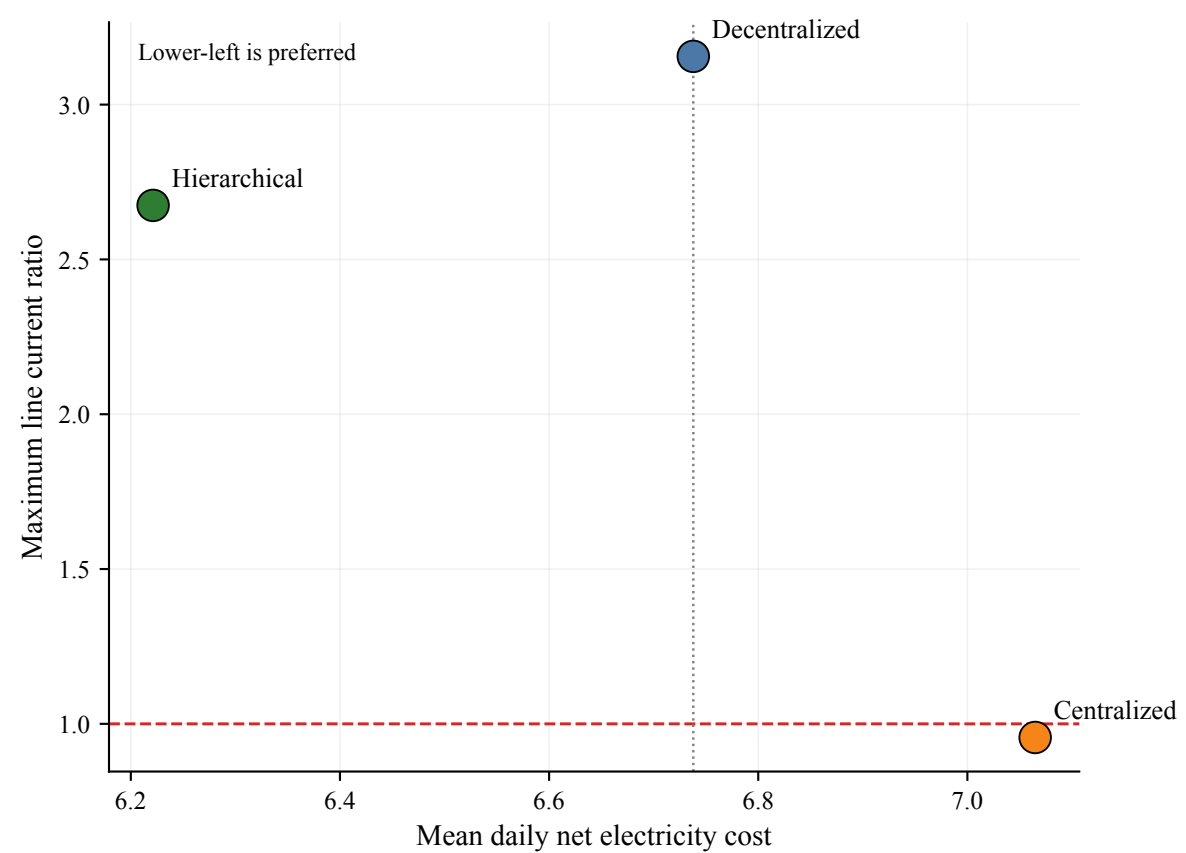

Supplement: Supplementary file 11 [file controller_tradeoff_map.pdf › Figures/controller_tradeoff_map.pdf]

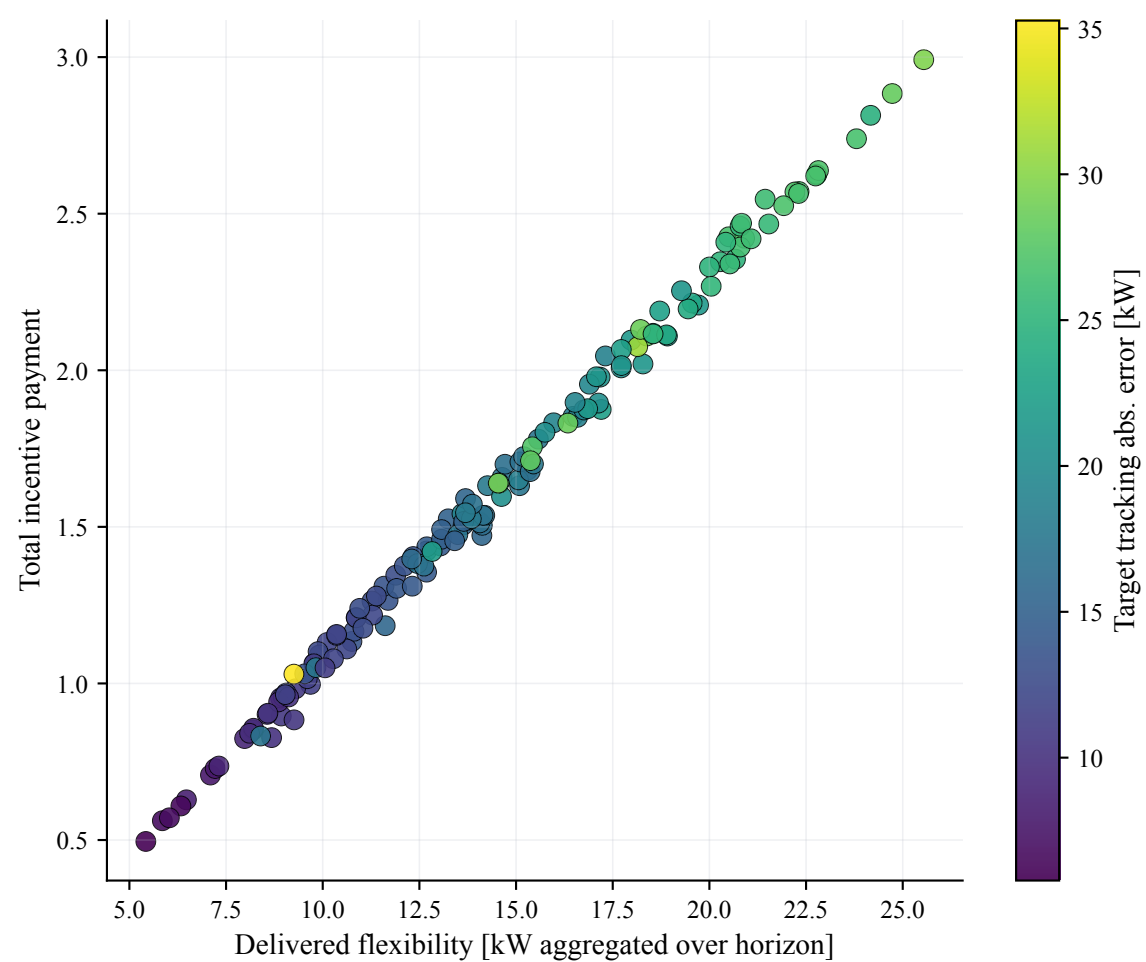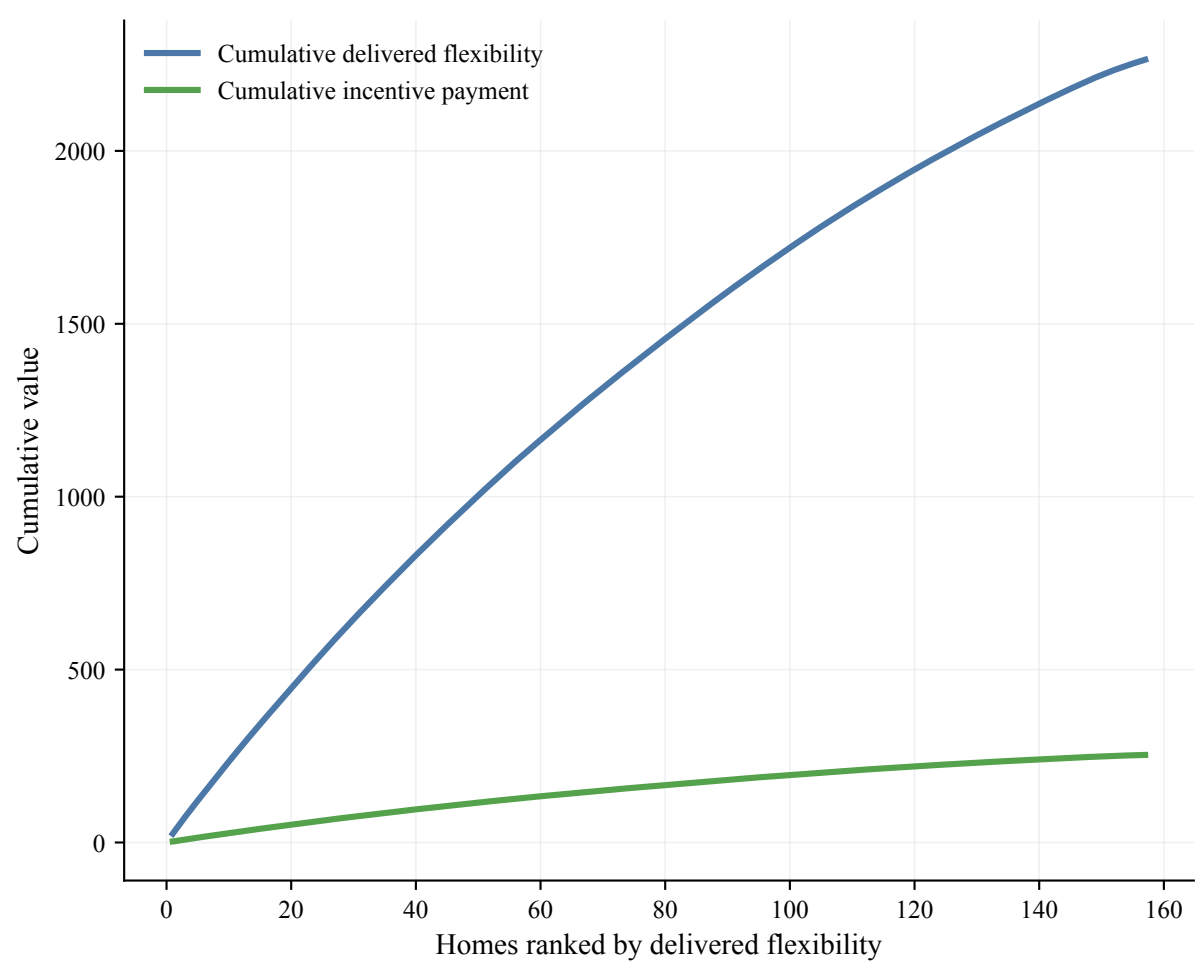

Supplement: Supplementary file 12 [file hierarchical_incentive_vs_flexibility.pdf › Figures/hierarchical_incentive_vs_flexibility.pdf]

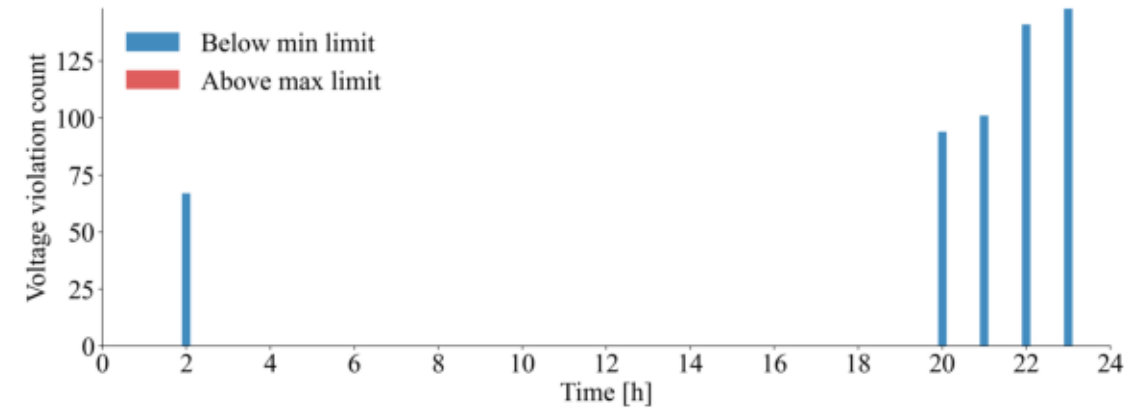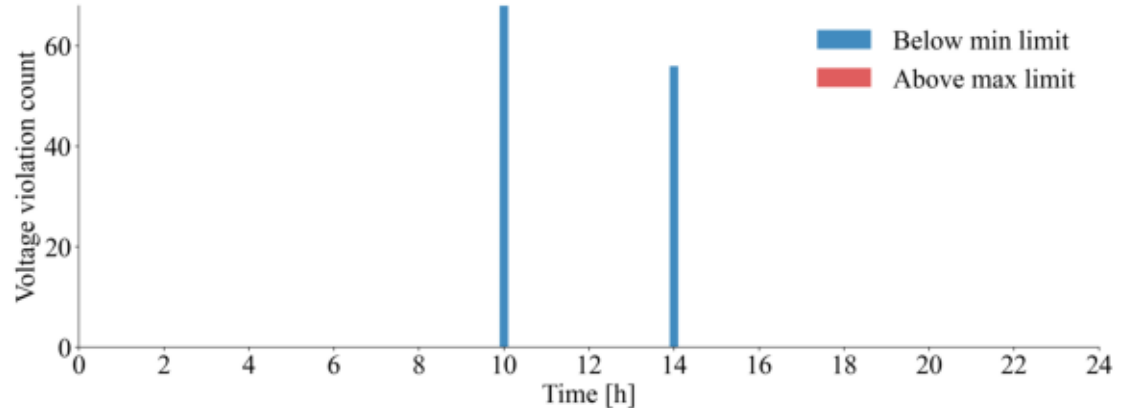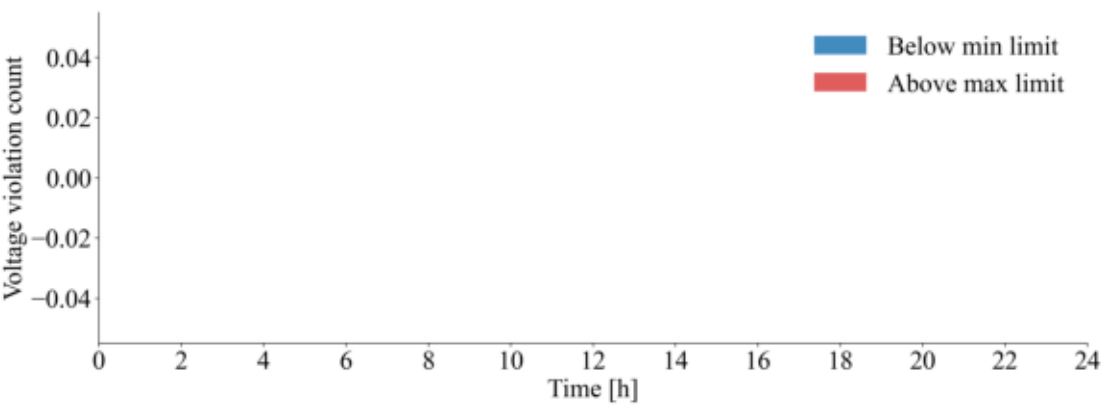

Supplement: Supplementary file 13 [file network_violation_image_board.pdf › Figures/network_violation_image_board.pdf]

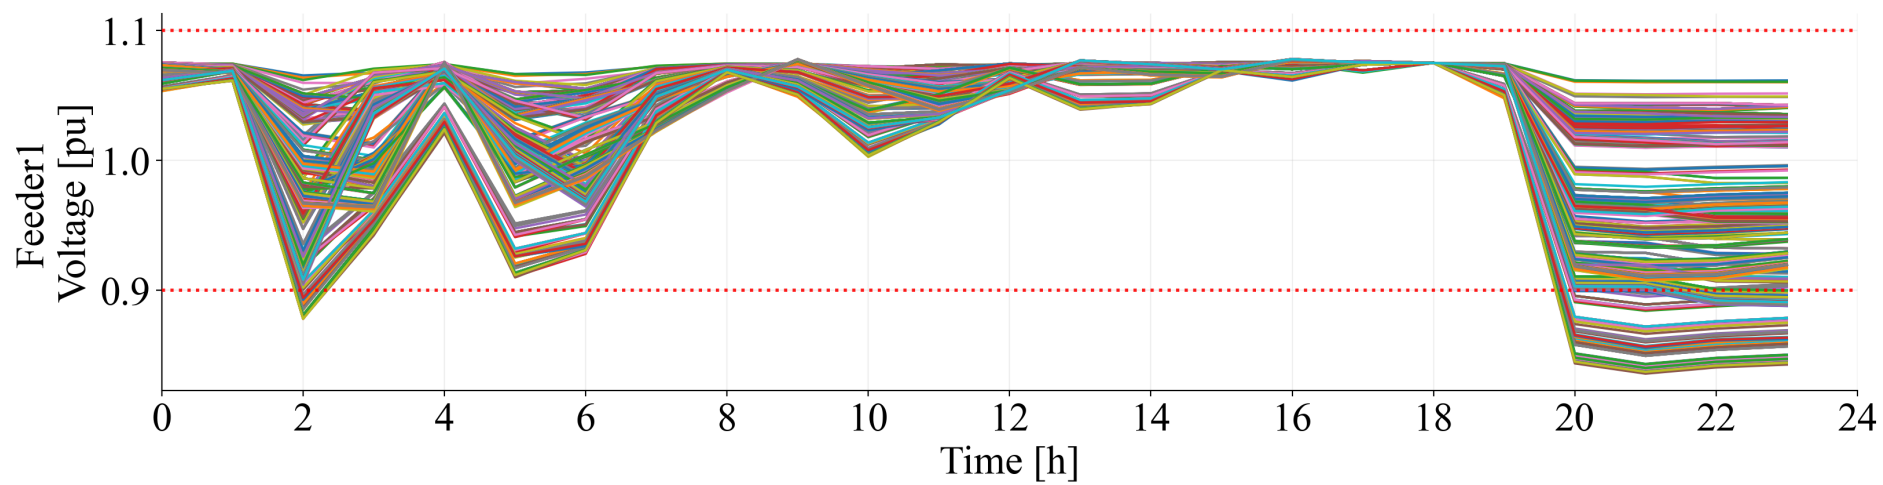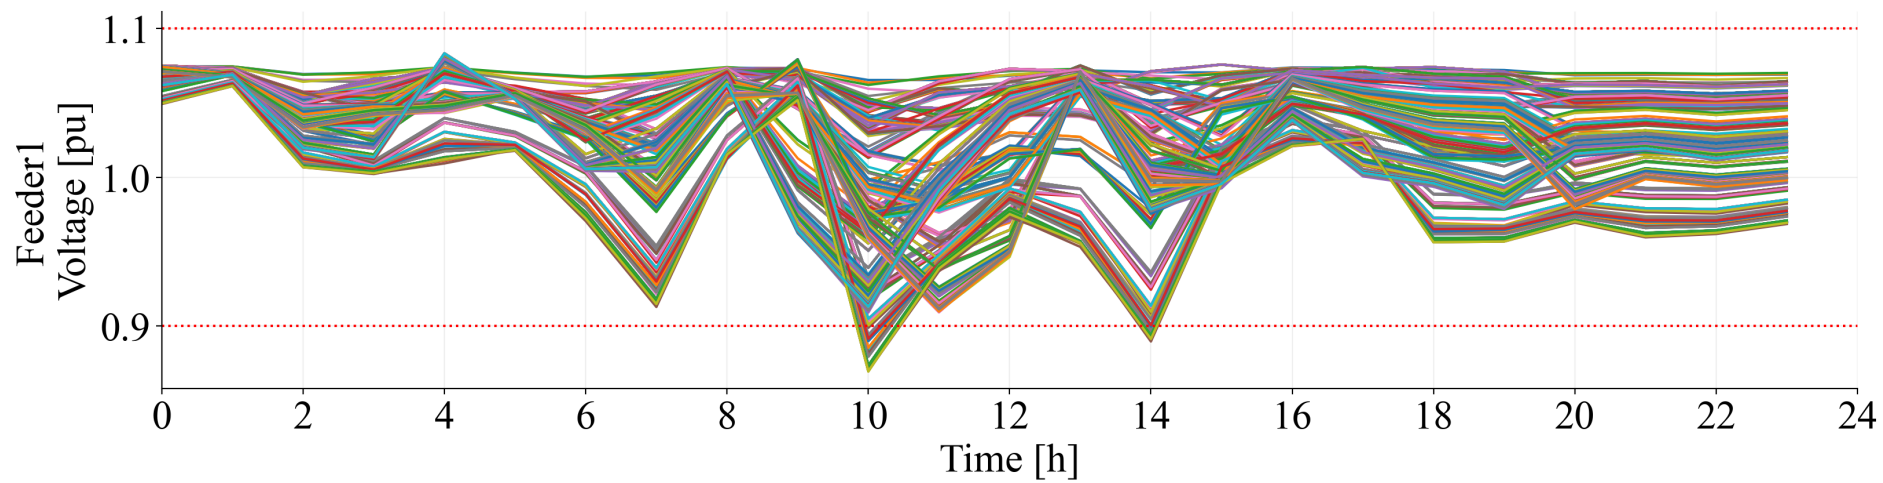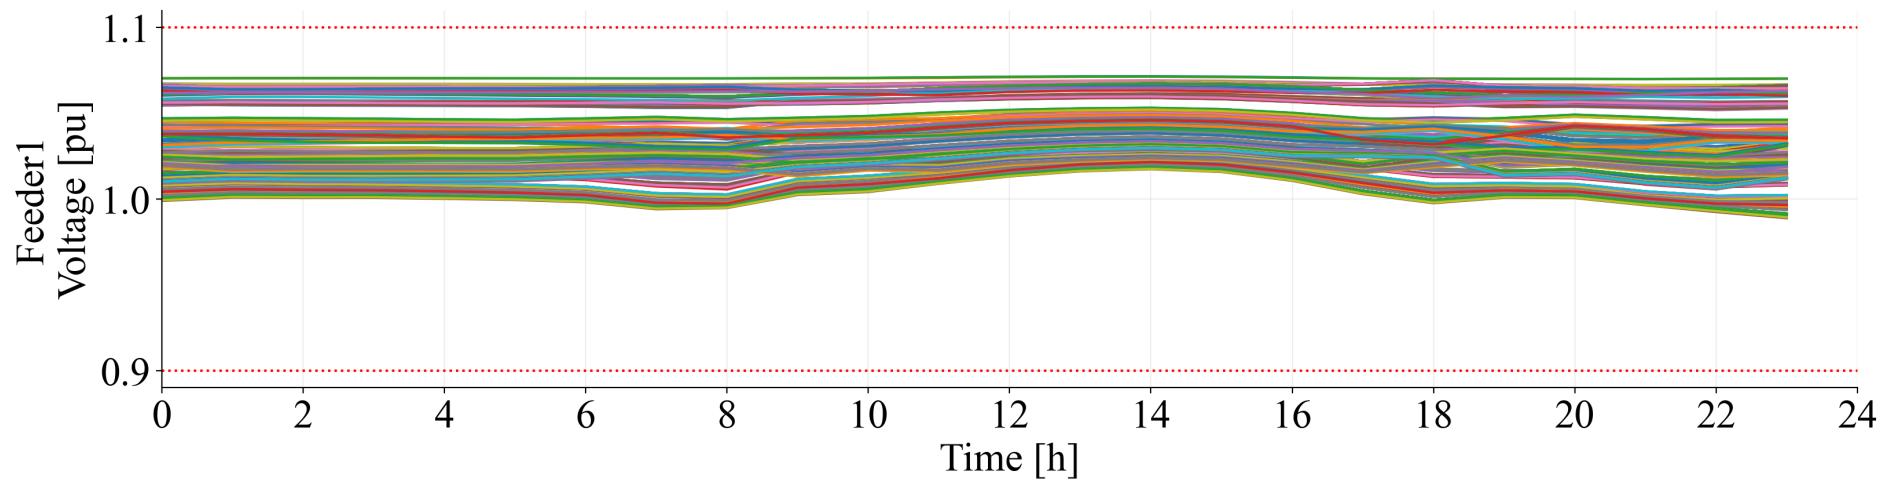

Supplement: Supplementary file 14 [file network_voltage_profile_image_board.pdf › Figures/network_voltage_profile_image_board.pdf]

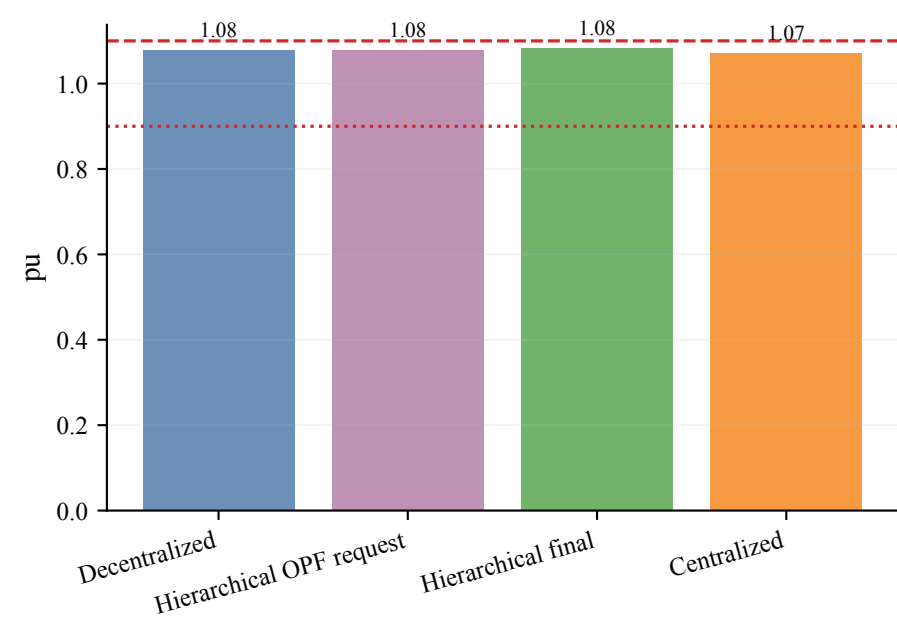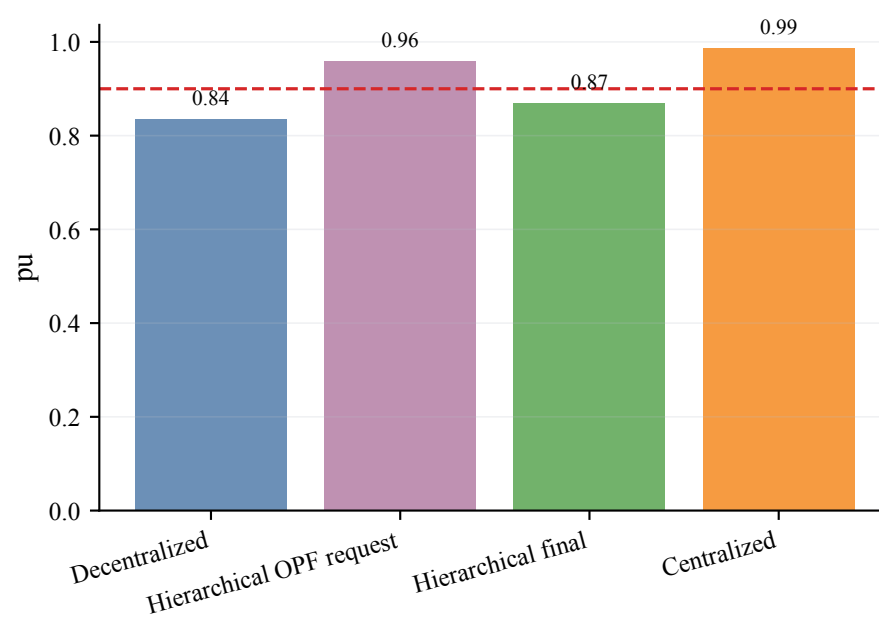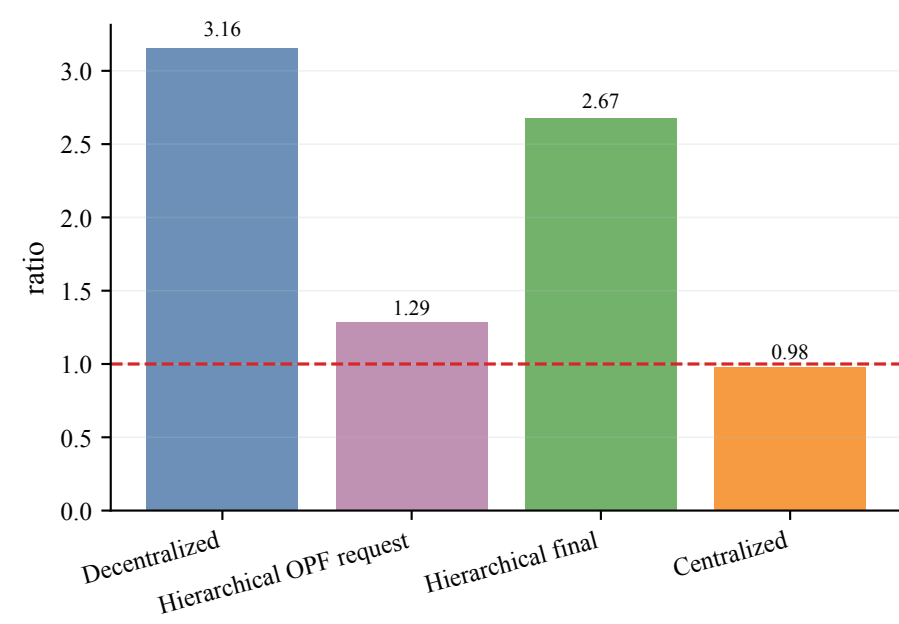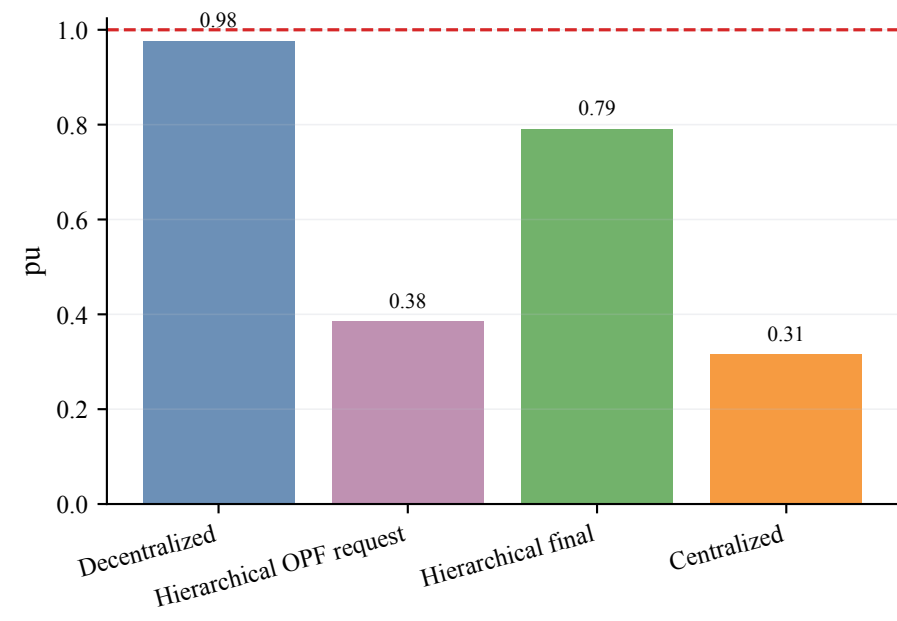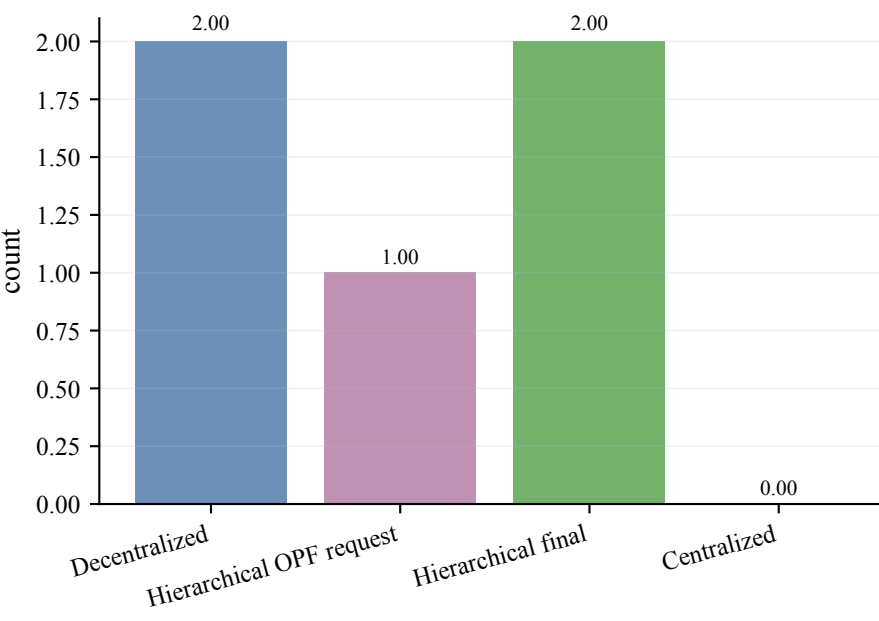

Supplement: Supplementary file 16 [file workflow_network_summary.pdf › Figures/workflow_network_summary.pdf]

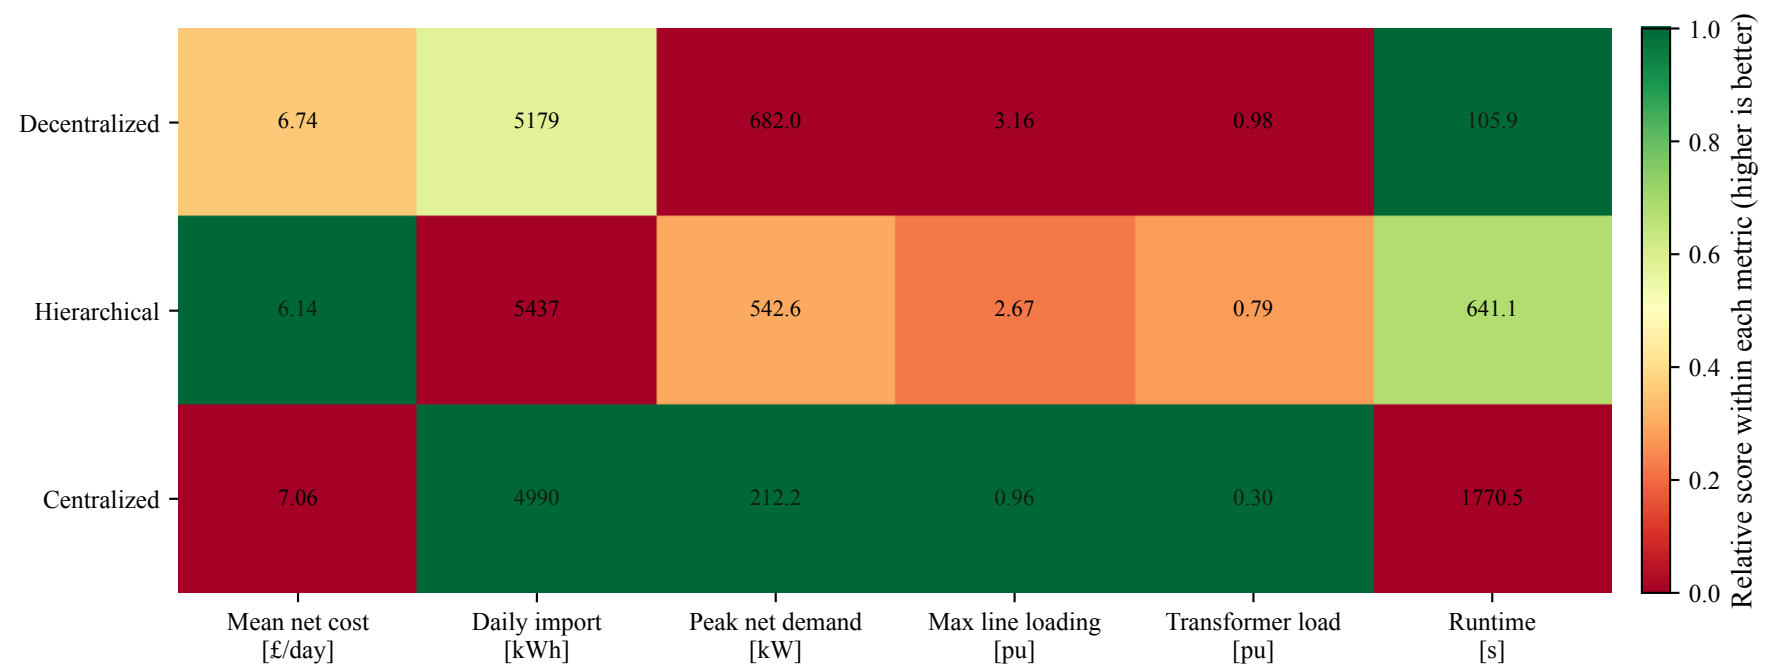

Supplement: Supplementary file 17 [file controller_publication_summary_heatmap.pdf › controller_publication_summary_heatmap.pdf]
